# Supplementary material for: Investigating pyridazine and phthalazine exchange in a series of iridium complexes in order to define their role in the catalytic transfer of magnetisation from para-hydrogen
Source: PubMed Central journal article supplement — Chem Sci. 2015 Apr 28;6(7):3981–93. doi: 10.1039/c5sc00756a (PMC5707471; doi:10.1039/c5sc00756a), 2015-04-28

# Investigating pyridazine and phthalazine exchange in a series of iridium complexes in order to define their role in the catalytic transfer of magnetisation from *parahydrogen*

Kate M. Appleby, Ryan E. Mewis, Alexandra M. Olaru, Gary G. R. Green, Ian J. S. Fairlamb and Simon B. Duckett\*

Centre for Hyperpolarisation in Magnetic Resonance, Department of Chemistry, University of York, York, YO10 5DD, UK.

## Contents

|                                                                                                                      |    |
|----------------------------------------------------------------------------------------------------------------------|----|
| 1. Characterisation data .....                                                                                       | 2  |
| 2. Hydride and substrate ligand exchange dynamics .....                                                              | 5  |
| 3. Mechanism of H <sub>2</sub> loss .....                                                                            | 6  |
| 4. SABRE enhancements achieved using 4a and 4b vary with [substrate] .....                                           | 7  |
| 5. SABRE enhancements achieved using 4a and 4b vary with temperature .....                                           | 7  |
| 6. SABRE enhancements using 4a vary with dilution.....                                                               | 8  |
| 7. SABRE enhancements using 4a and 4b vary with PTF: detection of longitudinal magnetisation...8                     |    |
| 8. SABRE enhancements using 4a and 4b vary with PTF: detection of longitudinal two-spin and higher order terms ..... | 12 |
| 9. SABRE enhancements using 4a and 4b vary with bubbling time.....                                                   | 15 |
| 10. Calculation of T <sub>1</sub> values for magnetic states in pyridazine and phthalazine.....                      | 23 |
| 11. Model for ligand exchange in 4a and 4b.....                                                                      | 27 |
| 12. Useful <sup>1</sup> H NMR spectra .....                                                                          | 29 |

## Supplementary Data

### 1. Characterisation data

#### [Ir(COD)(IMes)(pdz)]Cl (**2a**)

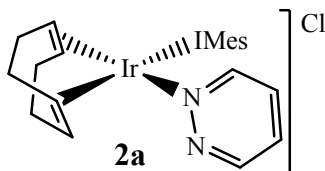

$^1\text{H}$  NMR (500 MHz, methanol- $d_4$ ): 9.08 (d, 1H,  $J_{\text{HH}} = 4\text{ Hz}$ , IrNCH), 7.88 (d, 1H,  $J_{\text{HH}} = 5\text{ Hz}$ , IrNNCH), 7.70 (m, 1H, IrNCHCH), 7.51 (m, 1H, IrNNCHCH), 7.43 (s, 2H, IrCNCH), 7.23 (s, 2H, NCC(CH<sub>3</sub>)CH), 6.94 (s, 2H, NCC(CH<sub>3</sub>)CH), 3.70 (s, 2H, IrCH), 3.29 (m, 2H, IrCH), 2.45 (s, 6H, NCC(CH<sub>3</sub>)CHC(CH<sub>3</sub>)), 2.37 (s, 6H, NCC(CH<sub>3</sub>)), 2.00 (m, 4H, IrCHCH<sub>2</sub>), 1.90 (s, 6H, NCC(CH<sub>3</sub>)), 1.67 (m, 4H, IrCHCH<sub>2</sub>).  $^{13}\text{C}$  NMR (400 MHz, methanol- $d_4$ ): 173 (s, IrCN), 155 (s, IrNNCH), 153 (s, IrNCH), 148 (s, NCC(CH<sub>3</sub>)), 140 (s, NCC(CH<sub>3</sub>)CHC(CH<sub>3</sub>)), 136 (s, NCC(CH<sub>3</sub>)), 135 (s, NCC(CH<sub>3</sub>)), 131 (s, IrNNCHCH), 129 (s, NCC(CH<sub>3</sub>)CH), 127 (s, IrNCHCH), 125 (s, IrCNCH), 81 (s, IrCH), 65 (s, IrCH), 32 (s, IrCHCH<sub>2</sub>), 29 (s, IrCHCH<sub>2</sub>), 20 (s, NCC(CH<sub>3</sub>)CHC(CH<sub>3</sub>)), 17 (s, NCC(CH<sub>3</sub>)).  $^{15}\text{N}$  NMR (500 MHz, methanol- $d_4$ ): 386.1 (IrN), 311.8 (IrNN), 195.4 (IrCN). ESI (MS): 685.4 [M-Cl], 605.4 [M-Cl-pdz].

#### [Ir(COD)(IMes)(phth)]Cl (**2b**)

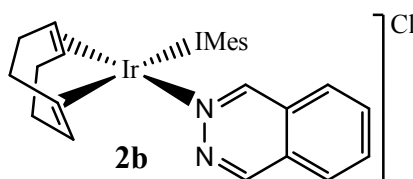

$^1\text{H}$  NMR (400 MHz, methanol- $d_4$ ): 9.55 (s, 1H, IrNCH), 8.37 (s, 1H, IrNNCH), 8.22-8.18 (m, 3H, IrNNCHCCHCHCH), 7.86 (d, 1H,  $J = 6.6$ , IrNCHCCH), 7.40 (s, 2H, IrCNCH), 7.27 (s, 2H, NCC(CH<sub>3</sub>)CH), 6.61 (s, 2H, NC(CH<sub>3</sub>)CH), 3.71 (s (br), 2H, IrCH), 3.40 (m, 2H, IrCH), 2.43 (s, 6H, NCC(CH<sub>3</sub>)CHC(CH<sub>3</sub>)), 2.40 (s, 6H, NCC(CH<sub>3</sub>)), 2.05 (m, 4H, IrCHCH<sub>2</sub>), 1.91 (m, 4H, IrCHCH<sub>2</sub>), 1.70 (s, 6H, NCC(CH<sub>3</sub>)).  $^{13}\text{C}$  NMR (400 MHz, methanol- $d_4$ ): 172 (s, IrCN), 155 (s, IrNNCH), 152 (s, IrNCH), 139 (s, NCC(CH<sub>3</sub>)CHC(CH<sub>3</sub>)), 136 (s, NCC(CH<sub>3</sub>)), 135 (s, IrNNCHCCHCHCH), 129 (s, NCC(CH<sub>3</sub>)CH), 128 (s, NCC(CH<sub>3</sub>)CH), 128 (s, IrNNCHC), 127 (s, IrNNCHCCHCHCH), 127 (s, IrNCHCCH), 125 (s, IrNCHC), 125 (s, IrCNCH), 81 (s, IrCH), 29 (s, IrCHCH<sub>2</sub>), 20 (s, NCC(CH<sub>3</sub>)CHC(CH<sub>3</sub>)), 17 (NCC(CH<sub>3</sub>)).  $^{15}\text{N}$  NMR (500 MHz, methanol- $d_4$ ): 386.0 (IrN), 311.5 (IrNN), 195.2 (IrCN). ESI (MS): 735.4 [M-Cl], 605.4 [M-Cl-phth].

**[Ir(COD)(H)<sub>2</sub>(IMes)(pdz)]Cl (3a)**

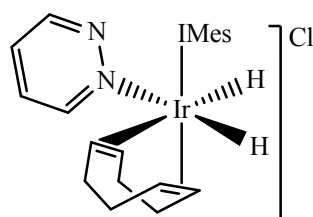

**3a**

<sup>1</sup>H NMR (methanol-*d*<sub>4</sub>, 500 MHz): 9.05 (d, *J* = 4.8, 1H, IrNNCH), 9.02 (d, *J* = 5.5, 1H, IrNCH), 7.90 (d.d, *J* = 8.3, 5.1, 1H, IrNNCHCH), 7.62 (d.d, *J* = 8.3, 5.1, 1H, IrNCHCH), 7.36 (s, 2H, IrCNCH), 7.03 (s, 2H, NCC(CH<sub>3</sub>)CH), 7.00 (s, 2H, NCC(CH<sub>3</sub>)CH), 5.09 (m (br), 1H, IrCH) 5.02 (m (br), 1H, IrCH), 4.45 (m (br), 1H, IrCH), 3.74 (m (br), 1H, IrCH), 2.54 (m (br), 1H, IrCHCH<sub>2</sub>), 2.39 (s, 6H, NCC(CH<sub>3</sub>)CHC(CH<sub>3</sub>)), 2.23 (m (br), 1H, IrCHCH<sub>2</sub>), 2.19 (s, 6H, NCC(CH<sub>3</sub>)), 2.00 (m (br), 1H, IrCHCH<sub>2</sub>), 1.90 (m (br), 2H, IrCHCH<sub>2</sub>), 1.81 (s, 6H, NCC(CH<sub>3</sub>)), 1.75 (m (br), 1H, IrCHCH<sub>2</sub>), 1.65 (m (br), 1H, IrCHCH<sub>2</sub>), 1.25 (m (br), 1H, IrCHCH<sub>2</sub>), -13.84 (d, *J* = 3.8, 1H, **H**IrCH), -17.69 (d, *J* = 3.8, 1H, **H**IrN). <sup>13</sup>C NMR (methanol-*d*<sub>4</sub>, 400 MHz): 163.1 (s, IrNNCH), 154.2 (s, IrCN), 153.12 (IrNCH), 139.6 (s, NCC(CH<sub>3</sub>)CHC(CH<sub>3</sub>)), 136.6 (s, NCC(CH<sub>3</sub>)), 135.4 (s, NCC(CH<sub>3</sub>)), 131.2 (s, IrNCHCH), 129.2 (s, NCC(CH<sub>3</sub>)CH), 128.8 (s, NCC(CH<sub>3</sub>)CH), 128.1 (s, IrNNCHCH), 124.1 (IrCNCH), 97.7 (s, IrCH), 95.1 (s, IrCH), 82.6 (s, IrCH), 79.0 (s, IrCH), 34.4 (s, IrCHCH<sub>2</sub>), 30.8 (s, IrCHCH<sub>2</sub>), 28.3 (s, IrCHCH<sub>2</sub>), 27.8 (s, IrCHCH<sub>2</sub>), 19.7 (s, NCC(CH<sub>3</sub>)CHC(CH<sub>3</sub>)), 17.6 (s, NCC(CH<sub>3</sub>)), 16.6 (s, NCC(CH<sub>3</sub>)). <sup>15</sup>N NMR (methanol-*d*<sub>4</sub>, 500 MHz): 400.1 (IrNN), 294.3 (IrNN), 197.8 (IrCN).

**[Ir(COD)(H)<sub>2</sub>(IMes)(phth)]Cl (3b)**

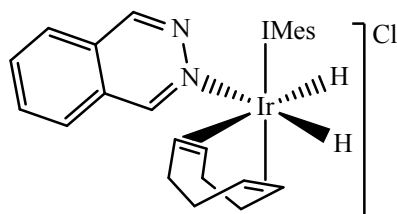

**3b**

<sup>1</sup>H NMR (methanol-*d*<sub>4</sub>, 500 MHz): 9.52 (s, 1H, IrNNCH), 9.45 (s, 1H, IrNCH), 8.31 (d, *J* = 7.9, 1H, IrNNCHCCH), 8.27 (t.d, *J* = 7.5, 1.0, 1H, IrNCHCCHCH), 8.21 (t.d, *J* = 7.5, 1.0, 1H, IrNNCHCCHCH), 8.03 (d, *J* = 8.0, 1H, IrNCHCCH), 7.32 (s, 2H, IrCNCH), 6.99 (s, 2H, NCC(CH<sub>3</sub>)CH), 6.76 (s, 2H, NCC(CH<sub>3</sub>)CH), 5.23 (m, 1H, IrCH) 5.18 (m, 1H, IrCH), 4.33 (m, 1H, IrCH), 3.85 (t.d, *J* = 8.4, 3.9, 1H, IrCH), 2.76 (m (br), 1H, IrCHCH<sub>2</sub>), 2.34 (s, 6H, NCC(CH<sub>3</sub>)CHC(CH<sub>3</sub>)), 2.26 (s, 6H, NCC(CH<sub>3</sub>)), 2.01 (m (br), 1H, IrCHCH<sub>2</sub>), 1.90 (m (br), 1H, IrCHCH<sub>2</sub>), 1.74 (m (br), 3H, IrCHCH<sub>2</sub>), 1.62 (s, 6H, NCC(CH<sub>3</sub>)), 1.38 (m (br), 2H, IrCHCH<sub>2</sub>), -13.87 (d, *J* = 4.0, 1H, **H**IrCH), -17.55 (d, *J* = 5.1, 1H, **H**IrN). <sup>13</sup>C NMR (methanol-*d*<sub>4</sub>, 400 MHz): 162.8 (s, IrNCH), 154.2 (s, IrCN), 153.0 (IrNNCH), 139.5 (s, NCC(CH<sub>3</sub>)) 136.8 (s, NCC(CH<sub>3</sub>)), 135.4 (s, NCC(CH<sub>3</sub>)CHC(CH<sub>3</sub>)), 135.1 (s, IrNCHCCHCHCH), 129.2 (s, NCC(CH<sub>3</sub>)CH), 128.7 (s, IrNNCHC), 128.4 (s, NCC(CH<sub>3</sub>)CH), 127.0 (s, IrNCHCCH), 126.4 (s, IrNNCHCCH), 125.7 (s, IrNCHC), 124.0 (IrCNCH), 97.3 (s, IrCH), 95.3 (s, IrCH), 83.1 (s, IrCH), 78.6 (s, IrCH), 19.8 (s,

NCC(CH<sub>3</sub>)CHC(CH<sub>3</sub>), 17.6 (s, NCC(CH<sub>3</sub>)), 16.5 (s, NCC(CH<sub>3</sub>)). <sup>15</sup>N NMR (methanol-*d*<sub>4</sub>, 500 MHz): 368.9 (IrNN), 266.6 (IrNN), 198.0 (IrCN).

### [Ir(H)<sub>2</sub>(IMes)(pdz)<sub>3</sub>]Cl (**4a**) and [Ir(H)<sub>2</sub>(IMes)(phth)<sub>3</sub>]Cl (**4c**)

The numbering scheme used for the NMR assignments is presented in sScheme 1:

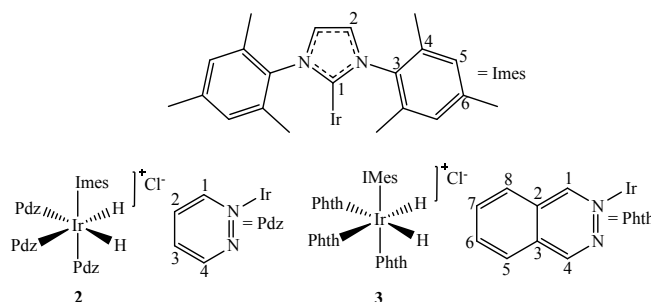

sScheme 1: Active complexes **4a** and **4b** formed with pyridazine and phthalazine respectively. The numbering scheme for NMR assignment is indicated.

NMR observations with [Ir(H)<sub>2</sub>(IMes)(pdz)<sub>3</sub>]Cl (**4a**).

**1** (2 mg, 3.12 μmol) and five equivalents of pyridazine (1.13 μL, 15.6 μmol) were dissolved in Methanol-*d*<sub>4</sub> (0.5 mL) in a 5 mm NMR tube and degassed. H<sub>2</sub> (3 bar) was added and the sample was heated to 348 K for 15 minutes to fully activate the complex and form **4a** in solution. Characterisation data is presented below. <sup>1</sup>H NMR (500 MHz, methanol-*d*<sub>4</sub>, 298 K): δ 9.62 (d.d, *J* = 5.6, 2.4 Hz, 1H, ax. pdz. 1), 9.32 (d.d, *J* = 5.6, 2.4 Hz, 2H, eq. pdz. 1), 8.76 (d.d, *J* = 4.8, 3.0 Hz, 2H, eq. pdz. 4), 8.29 (d.d, *J* = 4.8, 3.0 Hz, 1H, ax. pdz. 4), 7.62 (m, 2H, eq. pdz. 2), 7.48 (m, 1H, ax. pdz. 2), 7.42 (m, 1H, ax. pdz. 3), 7.39 (m, 2H, eq. pdz. 3), 7.09 (s, 2H, IMes 2), 6.69 (s, 4H, IMes 5), 2.22 (s, 6H, IMes CH<sub>3</sub>), 2.04 (s, 12H, IMes CH<sub>3</sub>), -21.47 (s, 2H, IrH). <sup>13</sup>C NMR (125 MHz, methanol-*d*<sub>4</sub>, 298 K): δ 162.0 (s, ax. pdz. 1), 157.8 (s, eq. pdz. 1), 152.4 (s, ax. pdz. 4), 151.5 (s, eq. pdz. 4), 129.6 (s, ax. pdz. 3), 129.2 (s, eq. pdz. 3), 126.3 (s, ax. pdz. 2), 126.1 (s, eq. pdz. 2), 151.7, (s, IMes 1), 138.1 (s, IMes 6), 137.5 (s, IMes 4), 135.4 (s, IMes 3), 128.4 (s, IMes 5), 122.4 (s, IMes 2), 19.5 (s, IMes CH<sub>3</sub>), 17.3 (s, IMes CH<sub>3</sub>). <sup>15</sup>N NMR (50.7 MHz, methanol-*d*<sub>4</sub>, 253 K): δ 392.2 (s, ax. pdz. IrNN), 390.0 (s, eq. pdz. IrNN), 326.2 (s, eq. pdz. IrN), 305.8 (s, ax. pdz. IrN), 194.5 (s, IMes), free pyridazine = 349.3.

Preparation of [Ir(H)<sub>2</sub>(IMes)(phth)<sub>3</sub>]Cl (**4b**).

**1** (2 mg, 3.12 μmol) and five equivalents of phthalazine (2.03 mg, 15.6 μmol) were dissolved in methanol-*d*<sub>4</sub> (0.5 mL) in a 5 mm NMR tube and degassed. H<sub>2</sub> (3 bar) was added and the sample was heated to 348 K for 15 minutes to fully activate the complex and form **4b** in solution. <sup>1</sup>H NMR (500 MHz, methanol-*d*<sub>4</sub>, 298 K): δ 10.28 (s, 1H, ax. phth. 1), 10.16 (s, 2H, eq. phth. 1), 9.27 (s, 2H, eq. phth. 4), 8.60 (s, 1H, ax. phth. 4), 8.18 (m, 2H, eq. phth. 5), 8.17 (m, 1H, ax. phth. 8), 8.12 (m, 2H, eq. phth. 7), 8.09 (m, 2H, eq. phth. 6), 8.07 (m, 1H, ax. phth. 7), 8.00 (m, 2H, eq. phth. 8), 7.99 (m, 1H, ax. phth. 6), 7.78 (m, 1H, ax. phth. 5), 7.15 (s, 2H, IMes 2), 6.37 (s, 4H, IMes 5), 2.07 (s, 12H, IMes CH<sub>3</sub>), 1.92 (s, 6H, IMes CH<sub>3</sub>), -21.00 (s, 2H, IrH). <sup>13</sup>C NMR (125 MHz, methanol-*d*<sub>4</sub>, 298 K): δ 160.9 (s, ax. phth. 1), 157.0 (s, eq. phth. 1), 151.9 (s, ax. phth. 4), 151.0 (s, eq. phth. 4), 133.6 (s, ax. phth. 6), 133.6 (s, eq. phth. 7), 133.3 (s, ax. phth. 7), 133.3 (s, eq. phth. 6), 128.3 (s, ax. phth. 2), 128.1 (s, eq. phth. 2), 126.6 (s, eq. phth. 8), 126.3 (s, ax. phth. 8), 126.3 (s, eq. phth. 5), 126.2 (s, ax. phth. 5), 125.5 (s, eq. phth. 3), 125.0 (s, ax. phth. 3), 151.8 (s, IMes 1), 137.9 (s, IMes 6), 137.3 (s, IMes 4), 135.2 (s, IMes 3), 128.2 (s, IMes 5), 122.4 (s, IMes 2), 19.6 (s, IMes CH<sub>3</sub>), 17.5 (s, IMes CH<sub>3</sub>). <sup>15</sup>N NMR (50.7 MHz, methanol-*d*<sub>4</sub>, 253 K): δ 362.8 (s, ax. phth. IrNN), 360.9 (s, eq. phth. IrNN), 299.7 (s, eq. phth. IrN), 278.8 (s, ax. phth. IrN), 194.3 (s, IMes), free phthalazine = 349.6.

The imbalance that is observed in the hydride ligand signal intensities that are seen in these NMR spectra is a consequence of two effects, the different line widths of the resonances and the detection of signals that are derived from  $I_z^1 I_z^2$ ,  $-I_z^1$  and  $+I_z^2$  terms, with relative proportions of 1 : 0.0625 : 0.0625. These three product operators reflect the magnetic states that are created as a result of PHIP.<sup>24</sup>

## 2. Hydride and substrate ligand exchange dynamics

sTable 1: Change in chemical shift of free pyridazine and phthalazine on binding to iridium to form 2a and 2b.

|                         | 2a    | $\Delta\delta$ | 2b    | $\Delta\delta$ |
|-------------------------|-------|----------------|-------|----------------|
| <sup>15</sup> N Ir-N=N- | 386.1 | -58.2          | 386.0 | -36.7          |
| <sup>15</sup> N Ir-N=N- | 311.8 | 16.1           | 311.5 | 37.8           |

sTable 2: Rate constants for haptotropic shifts, detected via selective 1D-EXSY methods at the specified temperatures.

| Temperature / K | Rate of Haptotropic shift / s <sup>-1</sup> |                |
|-----------------|---------------------------------------------|----------------|
|                 | 2a                                          | 2b             |
| 235             | -                                           | 0.923 ± 0.001  |
| 240             | 0.729 ± 0.001                               | 1.873 ± 0.003  |
| 245             | 1.501 ± 0.003                               | 3.955 ± 0.003  |
| 250             | 3.155 ± 0.002                               | 7.318 ± 0.004  |
| 255             | 5.80 ± 0.01                                 | 13.426 ± 0.004 |
| 260             | 12.74 ± 0.02                                | -              |

sTable 3: Experimentally determined activation parameters for haptotropic shifts in 2a and 2b in methanol-d<sub>4</sub>.

| Complex | $\Delta H^\ddagger$ / kJ mol <sup>-1</sup> | $\Delta S^\ddagger$ / J mol <sup>-1</sup> K <sup>-1</sup> | $\Delta G^\ddagger$ / kJ mol <sup>-1</sup><br>(300 K) |
|---------|--------------------------------------------|-----------------------------------------------------------|-------------------------------------------------------|
| 2a      | 71.3 ± 0.3                                 | 57 ± 1                                                    | 54.2 ± 0.4                                            |
| 2b      | 66.0 ± 0.1                                 | 43.0 ± 0.6                                                | 53.1 ± 0.2                                            |

sTable 4: Rate constants for ligand exchange detected via selective 1D-EXSY methods at the specified temperatures.

| Temp. / K | Rate of substrate dissociation/s <sup>-1</sup> |                 | Rate of H <sub>2</sub> dissociation/s <sup>-1</sup> |               | Rate of substrate haptotropic shift/s <sup>-1</sup> |                 |
|-----------|------------------------------------------------|-----------------|-----------------------------------------------------|---------------|-----------------------------------------------------|-----------------|
|           | 4a                                             | 4b              | 4a                                                  | 4b            | 4a                                                  | 4b              |
| 280       | 0.0454 ± 0.0002                                | 0.0603 ± 0.0003 | 0.091 ± 0.005                                       | 0.094 ± 0.005 | 0.0376 ± 0.0001                                     | 0.0326 ± 0.0002 |
| 285       | 0.0986 ± 0.0001                                | 0.1153 ± 0.0003 | 0.183 ± 0.003                                       | 0.169 ± 0.005 | 0.0942 ± 0.0002                                     | 0.0697 ± 0.0004 |
| 290       | 0.1926 ± 0.0002                                | 0.2110 ± 0.0003 | 0.347 ± 0.008                                       | 0.33 ± 0.01   | 0.1925 ± 0.0003                                     | 0.1419 ± 0.0005 |
| 295       | 0.3611 ± 0.0008                                | 0.382 ± 0.001   | 0.70 ± 0.02                                         | 0.59 ± 0.08   | 0.4078 ± 0.0008                                     | 0.3212 ± 0.0008 |
| 300/301   | 0.642 ± 0.003                                  | 0.663 ± 0.003   | 1.46 ± 0.01                                         | 1.12 ± 0.03   | 0.819 ± 0.02                                        | 0.673 ± 0.002   |
| 305       | 1.073 ± 0.006                                  | 1.085 ± 0.005   | 2.83 ± 0.06                                         | 1.69 ± 0.05   | 1.203 ± 0.005                                       | 1.103 ± 0.003   |
| 310       | 1.61 ± 0.02                                    | 1.69 ± 0.02     | 5.1 ± 0.1                                           | 3.11 ± 0.08   | 1.84 ± 0.04                                         | 1.98 ± 0.01     |
| 315       | 4.81 ± 0.01                                    | 3.03 ± 0.02     | -                                                   | 5.4 ± 0.1     | 5.01 ± 0.03                                         | 3.43 ± 0.02     |
| 320       | 8.93 ± 0.03                                    | 4.69 ± 0.03     | -                                                   | 9.3 ± 0.1     | 9.36 ± 0.04                                         | 5.69 ± 0.03     |
| 325       | -                                              | 7.57 ± 0.03     | -                                                   | 16.0 ± 0.5    | -                                                   | 8.22 ± 0.05     |

sTable 5: Experimentally-determined activation parameters for indicated ligand exchange processes in 4a and 4b in Methanol-d4

| Process                            | $\Delta H^\ddagger$<br>/kJ mol <sup>-1</sup> |              | $\Delta S^\ddagger$ /<br>J K <sup>-1</sup> mol <sup>-1</sup> |            | $\Delta G^\ddagger_{(300\text{ K})}$<br>/kJ mol <sup>-1</sup> |              |
|------------------------------------|----------------------------------------------|--------------|--------------------------------------------------------------|------------|---------------------------------------------------------------|--------------|
|                                    | 2c                                           | 3c           | 2c                                                           | 3c         | 2c                                                            | 3c           |
| <b>Complex</b>                     |                                              |              |                                                              |            |                                                               |              |
| <b>Substrate Haptotropic Shift</b> | 97.9 ± 0.3                                   | 92.0 ± 0.3   | 85 ± 1                                                       | 62 ± 1     | 72.5 ± 0.3                                                    | 73.3 ± 0.3   |
| <b>Substrate Dissociation</b>      | 94.3 ± 0.4                                   | 78.13 ± 0.06 | 72 ± 1                                                       | 17.4 ± 0.2 | 72.6 ± 0.3                                                    | 72.93 ± 0.06 |
| <b>H<sub>2</sub> loss</b>          | 95.6 ± 0.2                                   | 83.6 ± 0.1   | 82.4 ± 0.8                                                   | 39.8 ± 0.4 | 70.9 ± 0.3                                                    | 71.6 ± 0.2   |

sTable 6: Ligand exchange rate constants for 4a as a function of [pdz].

| [free pdz]/mM | Rate of pdz dissociation/s <sup>-1</sup> | Rate of pdz haptotropic shift / s <sup>-1</sup> | Rate of H <sub>2</sub> dissociation/s <sup>-1</sup> |
|---------------|------------------------------------------|-------------------------------------------------|-----------------------------------------------------|
| <b>17.35</b>  | 0.0986 ± 0.0001                          | 0.0942 ± 0.0001                                 | 0.183 ± 0.003                                       |
| <b>27.64</b>  | 0.0982 ± 0.0002                          | 0.0914 ± 0.0002                                 | 0.120 ± 0.003                                       |
| <b>63.27</b>  | 0.0994 ± 0.0002                          | 0.0955 ± 0.0002                                 | 0.052 ± 0.001                                       |
| <b>85.55</b>  | 0.1017 ± 0.0003                          | 0.0945 ± 0.0002                                 | 0.037 ± 0.001                                       |
| <b>115.75</b> | 0.0989 ± 0.0002                          | 0.0932 ± 0.0003                                 | 0.029 ± 0.001                                       |

sTable 7: Ligand exchange rate constants for 2b as a function of [phth].

| [free phth]/mM | Rate of phth dissociation/s <sup>-1</sup> | Rate of phth haptotropic shift / s <sup>-1</sup> | Rate of H <sub>2</sub> dissociation/s <sup>-1</sup> |
|----------------|-------------------------------------------|--------------------------------------------------|-----------------------------------------------------|
| <b>6.99</b>    | 0.1001 ± 0.0001                           | 0.0618 ± 0.0001                                  | 0.243 ± 0.007                                       |
| <b>19.22</b>   | 0.1192 ± 0.0002                           | 0.0711 ± 0.0002                                  | 0.172 ± 0.004                                       |
| <b>40.44</b>   | 0.1168 ± 0.0003                           | 0.0694 ± 0.0003                                  | 0.119 ± 0.005                                       |
| <b>78.56</b>   | 0.1037 ± 0.0002                           | 0.0630 ± 0.0001                                  | 0.083 ± 0.005                                       |
| <b>121.80</b>  | 0.1000 ± 0.0002                           | 0.0615 ± 0.0001                                  | 0.0643 ± 0.003                                      |

sTable 8: Ligand exchange rate constants for 4a as a function of [H<sub>2</sub>].

| H <sub>2</sub> pressure / bar | Rate of pdz dissociation / s <sup>-1</sup> | Rate of pdz haptotropic shift / s <sup>-1</sup> | Rate of H <sub>2</sub> dissociation / s <sup>-1</sup> |
|-------------------------------|--------------------------------------------|-------------------------------------------------|-------------------------------------------------------|
| 0.445                         | <b>0.466 ± 0.003</b>                       | <b>0.800 ± 0.001</b>                            | <b>0.428 ± 0.001</b>                                  |
| 1.032                         | <b>0.456 ± 0.003</b>                       | <b>0.797 ± 0.001</b>                            | <b>0.790 ± 0.003</b>                                  |
| 1.515                         | <b>0.456 ± 0.003</b>                       | <b>0.780 ± 0.001</b>                            | <b>0.94 ± 0.02</b>                                    |
| 2.000                         | <b>0.451 ± 0.003</b>                       | <b>0.778 ± 0.002</b>                            | <b>1.03 ± 0.01</b>                                    |
| 2.495                         | <b>0.456 ± 0.003</b>                       | <b>0.785 ± 0.002</b>                            | <b>1.10 ± 0.02</b>                                    |
| 2.990                         | <b>0.458 ± 0.003</b>                       | <b>0.780 ± 0.001</b>                            | <b>1.16 ± 0.03</b>                                    |

### 3. Mechanism of H<sub>2</sub> loss

sTable 9: H<sub>2</sub> exchange rate constants for 4a as a function of [pdz].

| [free pdz]/mM | Rate of H <sub>2</sub> dissociation/s <sup>-1</sup> | 1/Rate of H <sub>2</sub> dissociation/s |
|---------------|-----------------------------------------------------|-----------------------------------------|
| <b>17.35</b>  | 0.183 ± 0.003                                       | 5.46 ± 0.09                             |
| <b>27.64</b>  | 0.120 ± 0.003                                       | 8.3 ± 0.2                               |
| <b>63.27</b>  | 0.052 ± 0.001                                       | 19.2 ± 0.4                              |
| <b>85.55</b>  | 0.037 ± 0.001                                       | 26.8 ± 0.7                              |
| <b>115.75</b> | 0.029 ± 0.001                                       | 34 ± 1                                  |

sTable 10: H<sub>2</sub> exchange rate constants for 2b as a function of [phth].

| [free phth]/mM | Rate of H <sub>2</sub> dissociation/s <sup>-1</sup> | 1/Rate of H <sub>2</sub> dissociation/s |
|----------------|-----------------------------------------------------|-----------------------------------------|
| 6.99           | 0.243 ± 0.007                                       | 4.1 ± 0.1                               |
| 19.22          | 0.172 ± 0.004                                       | 5.8 ± 0.1                               |
| 40.44          | 0.119 ± 0.005                                       | 8.4 ± 0.4                               |
| 78.56          | 0.083 ± 0.005                                       | 12.1 ± 0.7                              |
| 121.80         | 0.0643 ± 0.003                                      | 15.6 ± 0.7                              |

#### 4. SABRE enhancements achieved using 4a and 4b vary with [substrate]

sTable 11: Enhancements in free pdz using 4a, as a function of [pdz].

| [free pdz]/mM | Enhancement Factor |         |          |                      |
|---------------|--------------------|---------|----------|----------------------|
|               | NCH                | NCHCH   | Total    | 1/Total              |
| 17.35         | -379 ± 1           | -37 ± 1 | -832 ± 3 | -0.001202 ± 0.000004 |
| 27.64         | -112 ± 1           | -15 ± 1 | -254 ± 3 | -0.00394 ± 0.00005   |
| 63.27         | -35 ± 1            | -8 ± 1  | -85 ± 3  | -0.0118 ± 0.0004     |
| 85.55         | -21 ± 1            | -5 ± 1  | -53 ± 3  | -0.019 ± 0.001       |
| 115.75        | -12 ± 1            | -3 ± 1  | -29 ± 3  | -0.034 ± 0.004       |

sTable 12: Enhancements in free phth using 4b, as a function of [phth].

| [free phth]/mM | Enhancement Factor |         |          |          |                  |
|----------------|--------------------|---------|----------|----------|------------------|
|                | NCH                | NCHCCH  | NCHCCHCH | Total    | 1/Total          |
| 37.56          | -65 ± 1            | -13 ± 1 | -3 ± 1   | -164 ± 3 | -0.0061 ± 0.0001 |
| 59.84          | -32 ± 1            | -7 ± 1  | -3 ± 1   | -85 ± 3  | -0.0118 ± 0.0004 |
| 78.56          | -25 ± 1            | -4 ± 1  | -1 ± 1   | -60 ± 3  | -0.0167 ± 0.0008 |
| 104.08         | -18 ± 1            | -2 ± 1  | 0 ± 1    | -39 ± 3  | -0.025 ± 0.002   |
| 121.80         | -12 ± 1            | -1 ± 1  | 0 ± 1    | -27 ± 3  | -0.037 ± 0.004   |

#### 5. SABRE enhancements achieved using 4a and 4b vary with temperature

sTable 13: Enhancements in free pdz using 4a, as a function of temperature.

| Temperature / K | Enhancement Factor |         |          |
|-----------------|--------------------|---------|----------|
|                 | NCH                | NCHCH   | Total    |
| 273.2           | -54 ± 1            | -4 ± 1  | -116 ± 3 |
| 293.2           | -105 ± 1           | -11 ± 1 | -233 ± 3 |
| 303.2           | -132 ± 1           | -16 ± 1 | -297 ± 3 |
| 313.2           | -165 ± 1           | -29 ± 1 | -387 ± 3 |
| 323.2           | -186 ± 1           | -33 ± 1 | -438 ± 3 |

sTable 14: Enhancements in free phth using 4b, as a function of temperature.

| Temperature / K | Enhancement Factor |         |          |          |
|-----------------|--------------------|---------|----------|----------|
|                 | NCH                | NCHCCH  | NCHCCHCH | Total    |
| 273.2           | -84 ± 1            | -10 ± 1 | -4 ± 1   | -195 ± 3 |
| 293.2           | -161 ± 1           | -18 ± 1 | -9 ± 1   | -376 ± 3 |
| 303.2           | -207 ± 1           | -31 ± 1 | -13 ± 1  | -501 ± 3 |
| 313.2           | -257 ± 1           | -38 ± 1 | -16 ± 1  | -622 ± 3 |
| 323.2           | -292 ± 1           | -42 ± 1 | -19 ± 1  | -708 ± 3 |

## 6. SABRE enhancements using 4a vary with dilution

sTable 15: Enhancements in free pdz using 4a, as a function of dilution, with 4.07 equivalents of free pyridazine in solution.

| [2]/mM | Enhancement Factor |         |           | Signal to noise ratio |       |       |
|--------|--------------------|---------|-----------|-----------------------|-------|-------|
|        | NCH                | NCHCH   | Total     | NCH                   | NCHCH | Total |
| 6.24   | -232 ± 1           | -24 ± 1 | -511 ± 3  | 18840                 | 3400  | 22240 |
| 4.16   | -476 ± 1           | -46 ± 1 | -1044 ± 3 | 16800                 | 3130  | 19930 |
| 2.77   | -568 ± 1           | -71 ± 1 | -1278 ± 3 | 18400                 | 5500  | 23910 |
| 1.23   | -573 ± 1           | -67 ± 1 | -1280 ± 3 | 9120                  | 1760  | 10880 |

## 7. SABRE enhancements using 4a and 4b vary with PTF: detection of longitudinal magnetisation

SABRE creates higher order magnetic terms which are optimally enhanced at different field values.<sup>70</sup> For pyridazine, these are exemplified by four two spin order combinations ( $2I_zI_z$ ,  $2S_zS_z$ ,  $2I_zS_z$ ,  $2I_zS'_z$ ), two three spin order combinations (eg  $4I_zS_zS'_z$ ) and one four spin order term ( $8I_zS_zI'_zS'_z$ ). These states were quantified using the only parahydrogen spectroscopy (OPSY) protocol.<sup>71, 72</sup> The single spin terms proved to be created more efficiently than two spin terms which in turn exceed those of three and four spin combinations.

### Pyridazine NCH resonance

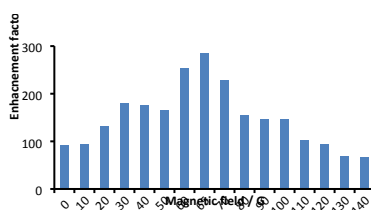

sFigure 1: PTF plot, normalized for the state selection process, over the range 0 to 140 G, for the NCH resonance in free pdz using 4a.

sTable 16: Enhancements in the NCH resonance of free pdz using 4a, as a function of PTF.



| Field / G | Enhancement Factor |         | Correction for Receiver Gain (/1) |
|-----------|--------------------|---------|-----------------------------------|
|           | NCH                | Total   |                                   |
| 0         | 46 ± 1             | 92 ± 2  | 92 ± 2                            |
| 10        | 47 ± 1             | 93 ± 2  | 93 ± 2                            |
| 20        | 66 ± 1             | 132 ± 2 | 132 ± 2                           |
| 30        | 90 ± 1             | 179 ± 2 | 179 ± 2                           |
| 40        | 88 ± 1             | 176 ± 2 | 176 ± 2                           |
| 50        | 83 ± 1             | 165 ± 2 | 165 ± 2                           |
| 60        | 126 ± 1            | 253 ± 2 | 253 ± 2                           |
| 65        | 142 ± 1            | 284 ± 2 | 284 ± 2                           |
| 70        | 114 ± 1            | 228 ± 2 | 228 ± 2                           |
| 80        | 77 ± 1             | 154 ± 2 | 154 ± 2                           |
| 90        | 73 ± 1             | 146 ± 2 | 146 ± 2                           |
| 100       | 73 ± 1             | 146 ± 2 | 146 ± 2                           |
| 110       | 51 ± 1             | 102 ± 2 | 102 ± 2                           |
| 120       | 46 ± 1             | 93 ± 2  | 93 ± 2                            |
| 130       | 34 ± 1             | 68 ± 2  | 68 ± 2                            |
| 140       | 33 ± 1             | 66 ± 2  | 66 ± 2                            |

Pyridazine NCHCH resonance

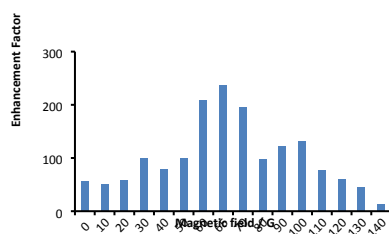

sFigure 2: PTF plot, normalized for the state selection process, over the range 0 to 140 G, for the NCHCH resonance of free pdz using 4a.

sTable 17: Enhancements in the NCHCH resonance of free pdz using 4a, as a function of PTF.

| Field / G | Enhancement Factor |         | Correction for Receiver Gain (/1) |
|-----------|--------------------|---------|-----------------------------------|
|           | NCHCH              | Total   |                                   |
| 0         | 28 ± 1             | 56 ± 2  | 56 ± 2                            |
| 10        | 25 ± 1             | 50 ± 2  | 50 ± 2                            |
| 20        | 30 ± 1             | 59 ± 2  | 59 ± 2                            |
| 30        | 50 ± 1             | 100 ± 2 | 100 ± 2                           |
| 40        | 40 ± 1             | 79 ± 2  | 79 ± 2                            |
| 50        | 50 ± 1             | 100 ± 2 | 100 ± 2                           |
| 60        | 105 ± 1            | 209 ± 2 | 209 ± 2                           |
| 65        | 119 ± 1            | 238 ± 2 | 238 ± 2                           |
| 70        | 98 ± 1             | 195 ± 2 | 195 ± 2                           |
| 80        | 49 ± 1             | 98 ± 2  | 98 ± 2                            |
| 90        | 61 ± 1             | 122 ± 2 | 122 ± 2                           |
| 100       | 66 ± 1             | 132 ± 2 | 132 ± 2                           |
| 110       | 39 ± 1             | 77 ± 2  | 77 ± 2                            |
| 120       | 30 ± 1             | 60 ± 2  | 60 ± 2                            |
| 130       | 23 ± 1             | 45 ± 2  | 45 ± 2                            |
| 140       | 6 ± 1              | 12 ± 2  | 12 ± 2                            |

Pyridazine single quantum coherences

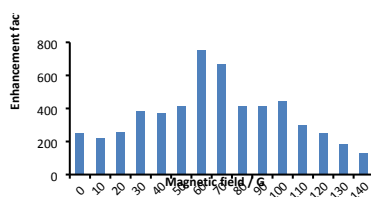

sFigure 3: PTF plot, normalized for the state selection process, over the range 0 to 140 G, for the single quantum coherences in free phth using 4b.

sTable 18: Enhancements in the single quantum coherence resonances of free phth using 4b, as a function of PTF.

| Field / G | Enhancement Factor |        |         | Correction for observation of 1 of 2 terms | Correction for Receiver Gain (/1) |
|-----------|--------------------|--------|---------|--------------------------------------------|-----------------------------------|
|           | NCH                | NCHCH  | Total   |                                            |                                   |
| 0         | 45 ± 2             | 18 ± 2 | 127 ± 6 | 250 ± 10                                   | 250 ± 10                          |
| 10        | 42 ± 2             | 12 ± 2 | 110 ± 6 | 220 ± 10                                   | 220 ± 10                          |
| 20        | 59 ± 2             | 4 ± 2  | 127 ± 6 | 250 ± 10                                   | 250 ± 10                          |
| 30        | 79 ± 2             | 17 ± 2 | 192 ± 6 | 380 ± 10                                   | 380 ± 10                          |
| 40        | 78 ± 2             | 15 ± 2 | 185 ± 6 | 370 ± 10                                   | 370 ± 10                          |
| 50        | 75 ± 2             | 29 ± 2 | 208 ± 6 | 420 ± 10                                   | 420 ± 10                          |
| 60        | 114 ± 2            | 75 ± 2 | 377 ± 6 | 750 ± 10                                   | 750 ± 10                          |
| 70        | 102 ± 2            | 66 ± 2 | 336 ± 6 | 670 ± 10                                   | 670 ± 10                          |
| 80        | 68 ± 2             | 36 ± 2 | 208 ± 6 | 420 ± 10                                   | 420 ± 10                          |
| 90        | 59 ± 2             | 45 ± 2 | 208 ± 6 | 420 ± 10                                   | 420 ± 10                          |
| 100       | 62 ± 2             | 49 ± 2 | 222 ± 6 | 440 ± 10                                   | 440 ± 10                          |
| 110       | 47 ± 2             | 28 ± 2 | 148 ± 6 | 300 ± 10                                   | 300 ± 10                          |
| 120       | 40 ± 2             | 23 ± 2 | 126 ± 6 | 250 ± 10                                   | 250 ± 10                          |
| 130       | 30 ± 2             | 16 ± 2 | 92 ± 6  | 180 ± 10                                   | 180 ± 10                          |
| 140       | 31 ± 2             | 3 ± 2  | 66 ± 6  | 130 ± 10                                   | 130 ± 10                          |

Phthalazine NCH

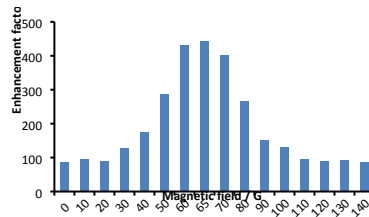

sFigure 4: PTF plot, normalized for the state selection process, over the range 0 to 140 G, for the NCH resonance in free phth using 4b.

sTable 19: Enhancements in the NCH resonance of free phth using 4b, as a function of PTF.

| Field / G | Enhancement Factor |         | Correction for Receiver Gain (/1) |
|-----------|--------------------|---------|-----------------------------------|
|           | NCH                | Total   |                                   |
| 0         | 43 ± 2             | 86 ± 4  | 86 ± 4                            |
| 10        | 48 ± 2             | 96 ± 4  | 96 ± 4                            |
| 20        | 45 ± 2             | 90 ± 4  | 90 ± 4                            |
| 30        | 64 ± 2             | 129 ± 4 | 129 ± 4                           |
| 40        | 88 ± 2             | 176 ± 4 | 176 ± 4                           |
| 50        | 143 ± 2            | 287 ± 4 | 287 ± 4                           |
| 60        | 217 ± 2            | 433 ± 4 | 433 ± 4                           |
| 65        | 222 ± 2            | 443 ± 4 | 443 ± 4                           |
| 70        | 201 ± 2            | 402 ± 4 | 402 ± 4                           |
| 80        | 133 ± 2            | 266 ± 4 | 266 ± 4                           |
| 90        | 76 ± 2             | 153 ± 4 | 153 ± 4                           |
| 100       | 65 ± 2             | 131 ± 4 | 131 ± 4                           |
| 110       | 48 ± 2             | 96 ± 4  | 96 ± 4                            |
| 120       | 45 ± 2             | 90 ± 4  | 90 ± 4                            |
| 130       | 46 ± 2             | 93 ± 4  | 93 ± 4                            |
| 140       | 44 ± 2             | 88 ± 4  | 88 ± 4                            |

Phthalazine NCHCCH

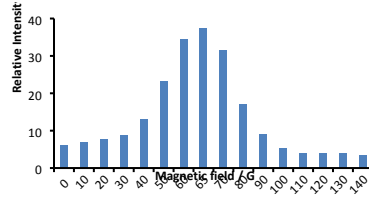

sFigure 5: PTF plot, normalized for the state selection process, over the range 0 to 140 G, for the NCHCCH resonance of free phth using 4b.

sTable 20: Enhancements in the NCHCCH resonance of free phth using 4b, as a function of PTF.

| Field / G | Enhancement Factor |            | Correction for Receiver Gain (/1) |
|-----------|--------------------|------------|-----------------------------------|
|           | NCHCCH             | Total      |                                   |
| 0         | 3.0 ± 0.1          | 5.9 ± 0.2  | 5.9 ± 0.2                         |
| 10        | 3.4 ± 0.1          | 6.8 ± 0.2  | 6.8 ± 0.2                         |
| 20        | 3.8 ± 0.1          | 7.5 ± 0.2  | 7.5 ± 0.2                         |
| 30        | 4.4 ± 0.1          | 8.8 ± 0.2  | 8.8 ± 0.2                         |
| 40        | 6.5 ± 0.1          | 13.0 ± 0.2 | 13.0 ± 0.2                        |
| 50        | 11.7 ± 0.1         | 23.3 ± 0.2 | 23.3 ± 0.2                        |
| 60        | 17.2 ± 0.1         | 34.5 ± 0.2 | 34.5 ± 0.2                        |
| 65        | 18.7 ± 0.1         | 37.4 ± 0.2 | 37.4 ± 0.2                        |
| 70        | 15.7 ± 0.1         | 31.5 ± 0.2 | 31.5 ± 0.2                        |
| 80        | 8.5 ± 0.1          | 17.0 ± 0.2 | 17.0 ± 0.2                        |
| 90        | 4.4 ± 0.1          | 8.9 ± 0.2  | 8.9 ± 0.2                         |
| 100       | 2.7 ± 0.1          | 5.4 ± 0.2  | 5.4 ± 0.2                         |
| 110       | 2.0 ± 0.1          | 4.0 ± 0.2  | 4.0 ± 0.2                         |
| 120       | 1.9 ± 0.1          | 3.8 ± 0.2  | 3.8 ± 0.2                         |
| 130       | 2.0 ± 0.1          | 4.0 ± 0.2  | 4.0 ± 0.2                         |
| 140       | 1.6 ± 0.1          | 3.3 ± 0.2  | 3.3 ± 0.2                         |

Phthalazine NCHCCHCH

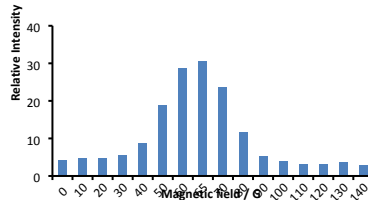

sFigure 6: PTF plot, normalized for the state selection process, over the range 0 to 140 G, for the NCHCCHCH resonance in free phth using 4b.

sTable 21: Enhancements in the NCHCCHCH resonance of free phth using 4b, as a function of PTF.

| Field / G | Enhancement Factor |            | Correction for Receiver Gain (/1) |
|-----------|--------------------|------------|-----------------------------------|
|           | NCHCCHCH           | Total      |                                   |
| 0         | 2.1 ± 0.1          | 4.2 ± 0.2  | 4.2 ± 0.2                         |
| 10        | 2.3 ± 0.1          | 4.6 ± 0.2  | 4.6 ± 0.2                         |
| 20        | 2.3 ± 0.1          | 4.6 ± 0.2  | 4.6 ± 0.2                         |
| 30        | 2.7 ± 0.1          | 5.5 ± 0.2  | 5.5 ± 0.2                         |
| 40        | 4.3 ± 0.1          | 8.6 ± 0.2  | 8.6 ± 0.2                         |
| 50        | 9.4 ± 0.1          | 18.8 ± 0.2 | 18.8 ± 0.2                        |
| 60        | 14.3 ± 0.1         | 28.5 ± 0.2 | 28.5 ± 0.2                        |
| 65        | 15.3 ± 0.1         | 30.5 ± 0.2 | 30.5 ± 0.2                        |
| 70        | 11.8 ± 0.1         | 23.5 ± 0.2 | 23.5 ± 0.2                        |
| 80        | 5.7 ± 0.1          | 11.5 ± 0.2 | 11.5 ± 0.2                        |
| 90        | 2.6 ± 0.1          | 5.2 ± 0.2  | 5.2 ± 0.2                         |
| 100       | 1.9 ± 0.1          | 3.9 ± 0.2  | 3.9 ± 0.2                         |
| 110       | 1.5 ± 0.1          | 3.0 ± 0.2  | 3.0 ± 0.2                         |
| 120       | 1.6 ± 0.1          | 3.1 ± 0.2  | 3.1 ± 0.2                         |
| 130       | 1.8 ± 0.1          | 3.5 ± 0.2  | 3.5 ± 0.2                         |

|     |           |           |           |
|-----|-----------|-----------|-----------|
| 140 | 1.4 ± 0.1 | 2.8 ± 0.2 | 2.8 ± 0.2 |
|-----|-----------|-----------|-----------|

### Phthalazine single quantum terms

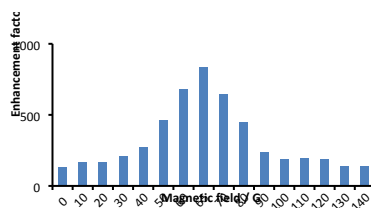

sFigure 7: PTF plot, normalized for the state selection process, over the range 0 to 140 G, for the single quantum coherence resonances in free phth using 4b.

sTable 22: Enhancements in the single quantum coherence resonances of free phth using 4b, as a function of PTF.

| Field / G | Enhancement Factor |            |            |         |                                            |                                   |
|-----------|--------------------|------------|------------|---------|--------------------------------------------|-----------------------------------|
|           | NCH                | NCHCCH     | NCHCCHCH   | Total   | Correction for observation of 1 of 2 terms | Correction for Receiver Gain (/1) |
| 0         | 29.0 ± 0.6         | 2.9 ± 0.2  | 0.8 ± 0.1  | 65 ± 1  | 130 ± 2                                    | 130 ± 2                           |
| 10        | 37.2 ± 0.6         | 4.0 ± 0.2  | 0.9 ± 0.1  | 84 ± 1  | 168 ± 2                                    | 168 ± 2                           |
| 20        | 36.7 ± 0.6         | 4.3 ± 0.2  | 0.8 ± 0.1  | 84 ± 1  | 167 ± 2                                    | 167 ± 2                           |
| 30        | 45.1 ± 0.6         | 5.7 ± 0.2  | 1.8 ± 0.1  | 105 ± 1 | 211 ± 2                                    | 211 ± 2                           |
| 40        | 55.6 ± 0.6         | 8.2 ± 0.2  | 4.4 ± 0.1  | 136 ± 1 | 273 ± 2                                    | 273 ± 2                           |
| 50        | 90.0 ± 0.6         | 14.9 ± 0.2 | 11.2 ± 0.1 | 232 ± 1 | 464 ± 2                                    | 464 ± 2                           |
| 60        | 130.8 ± 0.6        | 22.0 ± 0.2 | 17.1 ± 0.1 | 340 ± 1 | 679 ± 2                                    | 679 ± 2                           |
| 65        | 161.4 ± 0.6        | 27.0 ± 0.2 | 20.0 ± 0.1 | 417 ± 1 | 833 ± 2                                    | 833 ± 2                           |
| 70        | 126.1 ± 0.6        | 20.0 ± 0.2 | 14.0 ± 0.1 | 320 ± 1 | 640 ± 2                                    | 640 ± 2                           |
| 80        | 92.0 ± 0.6         | 12.0 ± 0.2 | 7.4 ± 0.1  | 223 ± 1 | 446 ± 2                                    | 446 ± 2                           |
| 90        | 50.1 ± 0.6         | 5.3 ± 0.2  | 3.0 ± 0.1  | 117 ± 1 | 234 ± 2                                    | 234 ± 2                           |
| 100       | 40.5 ± 0.6         | 3.5 ± 0.2  | 2.2 ± 0.1  | 93 ± 1  | 185 ± 2                                    | 185 ± 2                           |
| 110       | 43.7 ± 0.6         | 3.0 ± 0.2  | 1.9 ± 0.1  | 97 ± 1  | 194 ± 2                                    | 194 ± 2                           |
| 120       | 42.7 ± 0.6         | 2.6 ± 0.2  | 1.4 ± 0.1  | 93 ± 1  | 187 ± 2                                    | 187 ± 2                           |
| 130       | 32.1 ± 0.6         | 2.0 ± 0.2  | 0.5 ± 0.1  | 69 ± 1  | 139 ± 2                                    | 139 ± 2                           |
| 140       | 31.3 ± 0.6         | 1.9 ± 0.2  | 0.4 ± 0.1  | 67 ± 1  | 134 ± 2                                    | 134 ± 2                           |

## 8. SABRE enhancements using 4a and 4b vary with PTF: detection of longitudinal two-spin and higher order terms

### Pyridazine NCHCH double quantum state

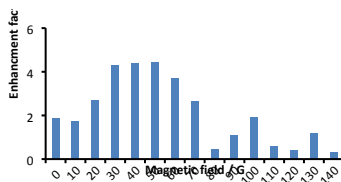

sFigure 8: PTF plot, normalized for the state selection process, over the range 0 to 140 G, for the  $S_Z S_Z$  term associated with the two chemically equivalent NCHCH in free pdz using 4a.

sTable 23: Enhancements in the NCHCH double quantum resonances of free pdz using 4a, as a function of PTF.

| Field / G | Enhancement Factor |            | Correction for observation of 1 of 4 terms | Correction for Receiver Gain (/16) |
|-----------|--------------------|------------|--------------------------------------------|------------------------------------|
|           | NCHCH              | Total      |                                            |                                    |
| 0         | 3.7 ± 0.2          | 7.4 ± 0.4  | 30 ± 2                                     | 1.9 ± 0.1                          |
| 10        | 3.5 ± 0.2          | 7.0 ± 0.4  | 28 ± 2                                     | 1.8 ± 0.1                          |
| 20        | 5.3 ± 0.2          | 10.7 ± 0.4 | 43 ± 2                                     | 2.7 ± 0.1                          |
| 30        | 8.6 ± 0.2          | 17.1 ± 0.4 | 68 ± 2                                     | 4.3 ± 0.1                          |
| 40        | 8.8 ± 0.2          | 17.6 ± 0.4 | 70 ± 2                                     | 4.4 ± 0.1                          |
| 50        | 8.9 ± 0.2          | 17.8 ± 0.4 | 71 ± 2                                     | 4.5 ± 0.1                          |
| 60        | 7.4 ± 0.2          | 14.8 ± 0.4 | 59 ± 2                                     | 3.7 ± 0.1                          |
| 70        | 5.3 ± 0.2          | 10.6 ± 0.4 | 42 ± 2                                     | 2.7 ± 0.1                          |
| 80        | 0.9 ± 0.2          | 1.8 ± 0.4  | 7 ± 2                                      | 0.5 ± 0.1                          |
| 90        | 2.2 ± 0.2          | 4.4 ± 0.4  | 18 ± 2                                     | 1.1 ± 0.1                          |
| 100       | 3.8 ± 0.2          | 7.6 ± 0.4  | 30 ± 2                                     | 1.9 ± 0.1                          |
| 110       | 1.2 ± 0.2          | 2.3 ± 0.4  | 9 ± 2                                      | 0.58 ± 0.1                         |
| 120       | 0.8 ± 0.2          | 1.6 ± 0.4  | 6 ± 2                                      | 0.4 ± 0.1                          |
| 130       | 2.4 ± 0.2          | 4.7 ± 0.4  | 19 ± 2                                     | 1.18 ± 0.1                         |
| 140       | 0.6 ± 0.2          | 1.2 ± 0.4  | 5 ± 2                                      | 0.3 ± 0.1                          |

### Pyridazine double quantum

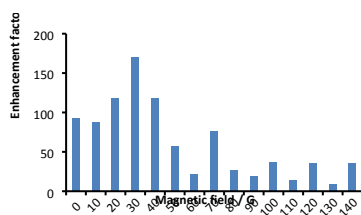

sFigure 9: PTF plot, normalized for the state selection process, over the range 0 to 140 G, for the double quantum coherence resonances in free pdz using 4a.

sTable 24: Enhancements in the double quantum resonances of free pdz using 4a, as a function of PTF.

| Field / G | Enhancement Factor |         |          | Correction for observation of 1 of 4 terms | Correction for Receiver Gain (/16) |
|-----------|--------------------|---------|----------|--------------------------------------------|------------------------------------|
|           | NCH                | NCHCH   | Total    |                                            |                                    |
| 0         | 87 ± 7             | 97 ± 8  | 370 ± 20 | 1480 ± 80                                  | 92 ± 5                             |
| 10        | 83 ± 7             | 93 ± 8  | 350 ± 20 | 1410 ± 80                                  | 88 ± 5                             |
| 20        | 111 ± 7            | 126 ± 8 | 470 ± 20 | 1900 ± 80                                  | 119 ± 5                            |
| 30        | 159 ± 7            | 182 ± 8 | 680 ± 20 | 2730 ± 80                                  | 170 ± 5                            |
| 40        | 109 ± 7            | 126 ± 8 | 470 ± 20 | 1880 ± 80                                  | 118 ± 5                            |
| 50        | 52 ± 7             | 63 ± 8  | 230 ± 20 | 920 ± 80                                   | 57 ± 5                             |
| 60        | 19 ± 7             | 24 ± 8  | 90 ± 20  | 350 ± 80                                   | 22 ± 5                             |
| 70        | 71 ± 7             | 82 ± 8  | 310 ± 20 | 1220 ± 80                                  | 76 ± 5                             |
| 80        | 26 ± 7             | 27 ± 8  | 100 ± 20 | 420 ± 80                                   | 26 ± 5                             |
| 90        | 19 ± 7             | 20 ± 8  | 80 ± 20  | 310 ± 80                                   | 20 ± 5                             |
| 100       | 33 ± 7             | 40 ± 8  | 150 ± 20 | 590 ± 80                                   | 37 ± 5                             |
| 110       | 13 ± 7             | 14 ± 8  | 50 ± 20  | 220 ± 80                                   | 14 ± 5                             |
| 120       | 32 ± 7             | 38 ± 8  | 150 ± 20 | 560 ± 80                                   | 35 ± 5                             |
| 130       | 9 ± 7              | 7 ± 8   | 30 ± 20  | 130 ± 80                                   | 8 ± 5                              |
| 140       | 33 ± 7             | 37 ± 8  | 140 ± 20 | 560 ± 80                                   | 35 ± 5                             |

### Pyridazine triple quantum

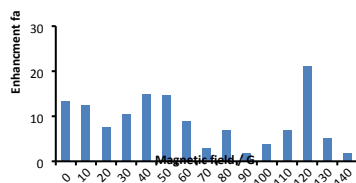

sFigure 10: PTF plot, normalized for the state selection process, over the range 0 to 140 G, for the triple quantum coherence resonances in free pdz using 4a.

sTable 25: Enhancements in the triple quantum resonances of pdz using 4a, as a function of PTF.

| Field / G | Enhancement Factor |          |            |                                            |                                     |
|-----------|--------------------|----------|------------|--------------------------------------------|-------------------------------------|
|           | NCH                | NCHCH    | Total      | Correction for observation of 1 of 8 terms | Correction for Receiver Gain (/912) |
| 0         | 500 ± 70           | 270 ± 70 | 1500 ± 200 | 6100 ± 800                                 | 13 ± 2                              |
| 10        | 420 ± 70           | 290 ± 70 | 1400 ± 200 | 5700 ± 800                                 | 13 ± 2                              |
| 20        | 330 ± 70           | 100 ± 70 | 900 ± 200  | 3400 ± 800                                 | 8 ± 2                               |
| 30        | 340 ± 70           | 250 ± 70 | 1200 ± 200 | 4700 ± 800                                 | 10 ± 2                              |
| 40        | 120 ± 70           | 730 ± 70 | 1700 ± 200 | 6800 ± 800                                 | 15 ± 2                              |
| 50        | 200 ± 70           | 640 ± 70 | 1700 ± 200 | 6700 ± 800                                 | 15 ± 2                              |
| 60        | 90 ± 70            | 410 ± 70 | 1000 ± 200 | 4000 ± 800                                 | 9 ± 2                               |
| 70        | 50 ± 70            | 130 ± 70 | 300 ± 200  | 1400 ± 800                                 | 3 ± 2                               |
| 80        | 240 ± 70           | 160 ± 70 | 800 ± 200  | 3200 ± 800                                 | 7 ± 2                               |
| 90        | 20 ± 70            | 90 ± 70  | 200 ± 200  | 900 ± 800                                  | 2 ± 2                               |
| 100       | 170 ± 70           | 40 ± 70  | 400 ± 200  | 1700 ± 800                                 | 4 ± 2                               |
| 110       | 110 ± 70           | 280 ± 70 | 800 ± 200  | 3100 ± 800                                 | 7 ± 2                               |
| 120       | 710 ± 70           | 490 ± 70 | 2400 ± 200 | 9600 ± 800                                 | 21 ± 2                              |
| 130       | 170 ± 70           | 120 ± 70 | 600 ± 200  | 2300 ± 800                                 | 5 ± 2                               |
| 140       | 40 ± 70            | 60 ± 70  | 200 ± 200  | 800 ± 800                                  | 2 ± 2                               |

Pyridazine quadruple quantum

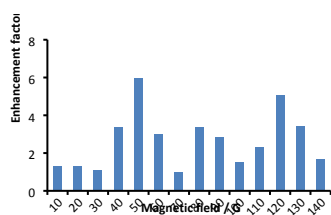

sFigure 11: PTF plot, normalized for the state selection process, over the range 0 to 140 G, for the quadruple quantum coherence resonances in free pdz using 4a.

sTable 26: Enhancements in the quadruple quantum resonances of free pdz using 4a, as a function of PTF.

| Field / G | Enhancement Factor |         |         |                                             |                                      |
|-----------|--------------------|---------|---------|---------------------------------------------|--------------------------------------|
|           | NCH                | NCHCH   | Total   | Correction for observation of 1 of 16 terms | Correction for Receiver Gain (/2050) |
| 0         | -                  | -       | -       | -                                           | -                                    |
| 10        | 35 ± 2             | 50 ± 4  | 169 ± 9 | 2700 ± 100                                  | 1.32 ± 0.05                          |
| 20        | 35 ± 2             | 48 ± 4  | 165 ± 9 | 2600 ± 100                                  | 1.29 ± 0.05                          |
| 30        | 29 ± 2             | 42 ± 4  | 141 ± 9 | 2300 ± 100                                  | 1.10 ± 0.05                          |
| 40        | 85 ± 2             | 129 ± 4 | 428 ± 9 | 6800 ± 100                                  | 3.34 ± 0.05                          |
| 50        | 155 ± 2            | 230 ± 4 | 764 ± 9 | 12200 ± 100                                 | 5.97 ± 0.05                          |
| 60        | 76 ± 2             | 114 ± 4 | 381 ± 9 | 6100 ± 100                                  | 2.97 ± 0.05                          |
| 70        | 27 ± 2             | 35 ± 4  | 123 ± 9 | 2000 ± 100                                  | 0.96 ± 0.05                          |
| 80        | 88 ± 2             | 126 ± 4 | 428 ± 9 | 6800 ± 100                                  | 3.34 ± 0.05                          |
| 90        | 71 ± 2             | 110 ± 4 | 363 ± 9 | 5800 ± 100                                  | 2.83 ± 0.05                          |
| 100       | 39 ± 2             | 56 ± 4  | 190 ± 9 | 3000 ± 100                                  | 1.48 ± 0.05                          |
| 110       | 60 ± 2             | 89 ± 4  | 297 ± 9 | 4800 ± 100                                  | 2.32 ± 0.05                          |
| 120       | 133 ± 2            | 192 ± 4 | 648 ± 9 | 10400 ± 100                                 | 5.06 ± 0.05                          |
| 130       | 88 ± 2             | 132 ± 4 | 439 ± 9 | 7000 ± 100                                  | 3.43 ± 0.05                          |
| 140       | 44 ± 2             | 63 ± 4  | 214 ± 9 | 3400 ± 100                                  | 1.67 ± 0.05                          |

Phthalazine double quantum terms

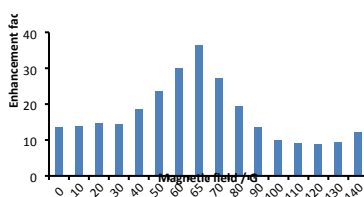

sFigure 12: PTF plot, normalized for the state selection process, over the range 0 to 140 G, for the double quantum coherence resonances in free phth, using 4b.

**sTable 27: Enhancements in the double quantum coherence resonances of free phth using 4b, as a function of PTF.**

| Field /<br>G | Enhancement Factor |         |          |           |                                               |                                        |
|--------------|--------------------|---------|----------|-----------|-----------------------------------------------|----------------------------------------|
|              | NCH                | NCHCCH  | NCHCCHCH | Total     | Correction for observation of 1 of<br>4 terms | Correction for Receiver<br>Gain (/128) |
| 0            | 13 ± 1             | 105 ± 8 | 99 ± 8   | 440 ± 30  | 1700 ± 100                                    | 13.6 ± 0.8                             |
| 10           | 16 ± 1             | 105 ± 8 | 99 ± 8   | 440 ± 30  | 1800 ± 100                                    | 13.8 ± 0.8                             |
| 20           | 17 ± 1             | 112 ± 8 | 106 ± 8  | 470 ± 30  | 1900 ± 100                                    | 14.7 ± 0.8                             |
| 30           | 15 ± 1             | 107 ± 8 | 107 ± 8  | 460 ± 30  | 1800 ± 100                                    | 14.3 ± 0.8                             |
| 40           | 17 ± 1             | 127 ± 8 | 151 ± 8  | 590 ± 30  | 2400 ± 100                                    | 18.4 ± 0.8                             |
| 50           | 29 ± 1             | 137 ± 8 | 209 ± 8  | 750 ± 30  | 3000 ± 100                                    | 23.4 ± 0.8                             |
| 60           | 72 ± 1             | 152 ± 8 | 254 ± 8  | 960 ± 30  | 3800 ± 100                                    | 29.9 ± 0.8                             |
| 65           | 119 ± 1            | 173 ± 8 | 291 ± 8  | 1170 ± 30 | 4700 ± 100                                    | 36.4 ± 0.8                             |
| 70           | 97 ± 1             | 133 ± 8 | 203 ± 8  | 870 ± 30  | 3500 ± 100                                    | 27.0 ± 0.8                             |
| 80           | 73 ± 1             | 103 ± 8 | 134 ± 8  | 620 ± 30  | 2500 ± 100                                    | 19.4 ± 0.8                             |
| 90           | 34 ± 1             | 84 ± 8  | 96 ± 8   | 430 ± 30  | 1700 ± 100                                    | 13.4 ± 0.8                             |
| 100          | 24 ± 1             | 61 ± 8  | 72 ± 8   | 310 ± 30  | 1300 ± 100                                    | 9.8 ± 0.8                              |
| 110          | 18 ± 1             | 59 ± 8  | 69 ± 8   | 290 ± 30  | 1200 ± 100                                    | 9.1 ± 0.8                              |
| 120          | 16 ± 1             | 59 ± 8  | 66 ± 8   | 280 ± 30  | 1100 ± 100                                    | 8.7 ± 0.8                              |
| 130          | 15 ± 1             | 67 ± 8  | 67 ± 8   | 300 ± 30  | 1200 ± 100                                    | 9.3 ± 0.8                              |
| 140          | 20 ± 1             | 87 ± 8  | 87 ± 8   | 390 ± 30  | 1600 ± 100                                    | 12.2 ± 0.8                             |

**sTable 28. Magnetic state, optimum PTF and enhancement level for the indicated pyradizine resonance relative to that of a single proton**

| Magnetic state                       | Optimum<br>PTF / G | Enhancement                 |
|--------------------------------------|--------------------|-----------------------------|
| Single spin NCH                      | 65                 | 284 ± 2                     |
| Single spin NCHCH                    | 65                 | 238 ± 2                     |
| Total single spin order<br>via OPSY  | 60                 | 750 ± 10                    |
| Selective NCHCH DQ<br>(SzSz)         | 50                 | 4.5 ± 0.1                   |
| Two spin order between<br>NCHCH      | 30                 | 170 ± 5                     |
| Three spin order (TQ,<br>eg IzSzS'z) | 40, 120            | 15 ± 2, 21 ± 2              |
| Four spin order (QQ,<br>IzI'zSzS'z)  | 50, 120            | 5.97 ± 0.05, 5.06 ±<br>0.05 |

**sTable 29. Magnetic state, optimum PTF and enhancement level for the indicated phthalazine resonance relative to that of a single proton**

| Magnetic state                      | Optimum PTF / G | Enhancement |
|-------------------------------------|-----------------|-------------|
| Single spin NCH                     | 65              | 443 ± 4     |
| Single spin<br>NCHCCH               | 65              | 37.4 ± 0.2  |
| Single spin<br>NCHCCHCH             | 65              | 30.5 ± 0.2  |
| Total single spin<br>order via OPSY | 65              | 833 ± 2     |
| Total two spin order<br>via OPSY    | 65              | 36.4 ± 0.8  |

## 9. SABRE enhancements using 4a and 4b vary with bubbling time

The Solver add-in of Microsoft Excel was used to find a value for the observed rate of polarisation build-up ( $k_{\text{obs}}$ ) by fitting the experimental data to a simulated curve, according to:

$$[B_t] = [B_e] - \frac{[B_e]}{\exp^{(k_{obs})t}}$$

Where  $[B_t]$  is the concentration of hyperpolarised substrate at time  $t$  and  $[B_e]$  is the concentration of hyperpolarised substrate at equilibrium.

Pyridazine NCH at 65 G.

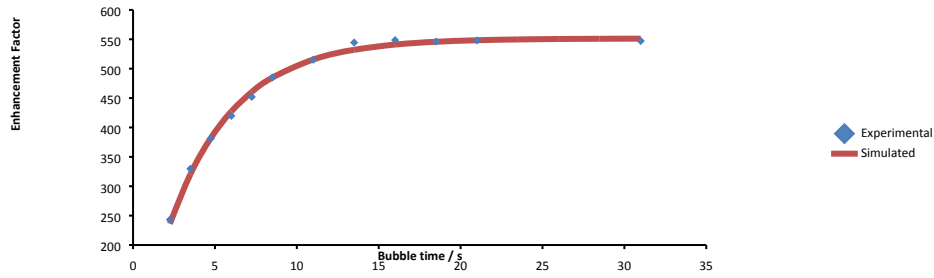

sFigure 13: Scatterplot showing the build-up of polarisation, normalized for the state selection process, at 65 G, for the NCH resonance in free pdz, using 4a.

sTable 30: Enhancements in the NCH resonance of free pdz using 4a, as a function of bubbling time.

| Bubble time / s | Enhancement Factor |         | Correction for Receiver Gain (/1) |
|-----------------|--------------------|---------|-----------------------------------|
|                 | NCH                | Total   |                                   |
| 1.25            | 122 ± 2            | 243 ± 4 | 243 ± 4                           |
| 2.5             | 165 ± 2            | 330 ± 4 | 330 ± 4                           |
| 3.75            | 191 ± 2            | 381 ± 4 | 381 ± 4                           |
| 5               | 210 ± 2            | 420 ± 4 | 420 ± 4                           |
| 6.25            | 226 ± 2            | 452 ± 4 | 452 ± 4                           |
| 7.5             | 243 ± 2            | 485 ± 4 | 485 ± 4                           |
| 10              | 258 ± 2            | 515 ± 4 | 515 ± 4                           |
| 12.5            | 272 ± 2            | 544 ± 4 | 544 ± 4                           |
| 15              | 274 ± 2            | 549 ± 4 | 549 ± 4                           |
| 17.5            | 273 ± 2            | 546 ± 4 | 546 ± 4                           |
| 20              | 274 ± 2            | 548 ± 4 | 548 ± 4                           |
| 30              | 274 ± 2            | 547 ± 4 | 547 ± 4                           |

Pyridazine NCHCH at 65 G.

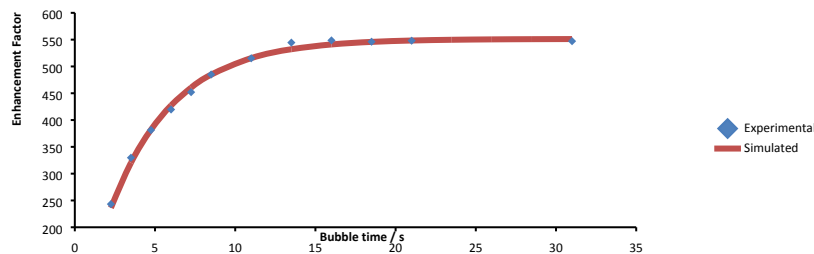

sFigure 14: Scatterplot showing the build-up of polarisation, normalized for the state selection process, at 65 G, for the NCHCH resonance free pdz using 4a .

sTable 31: Enhancements in the NCHCH resonance of free pdz using 4a, as a function of bubbling time.

| Bubble time / s | Enhancement Factor | Correction for Receiver Gain (/1) |
|-----------------|--------------------|-----------------------------------|
|-----------------|--------------------|-----------------------------------|



|      | NCHCH   |         | Total   |
|------|---------|---------|---------|
| 1.25 | 32 ± 1  | 63 ± 2  | 63 ± 2  |
| 2.5  | 49 ± 1  | 97 ± 2  | 97 ± 2  |
| 3.75 | 61 ± 1  | 123 ± 2 | 123 ± 2 |
| 5    | 68 ± 1  | 136 ± 2 | 136 ± 2 |
| 6.25 | 76 ± 1  | 152 ± 2 | 152 ± 2 |
| 7.5  | 83 ± 1  | 165 ± 2 | 165 ± 2 |
| 10   | 95 ± 1  | 189 ± 2 | 189 ± 2 |
| 12.5 | 101 ± 1 | 203 ± 2 | 203 ± 2 |
| 15   | 110 ± 1 | 220 ± 2 | 220 ± 2 |
| 17.5 | 115 ± 1 | 229 ± 2 | 229 ± 2 |
| 20   | 119 ± 1 | 238 ± 2 | 238 ± 2 |
| 22.5 | 124 ± 1 | 248 ± 2 | 248 ± 2 |
| 25   | 126 ± 1 | 253 ± 2 | 253 ± 2 |
| 30   | 130 ± 1 | 261 ± 2 | 261 ± 2 |

Pyridazine NCHCH, DQ, at 50 G.

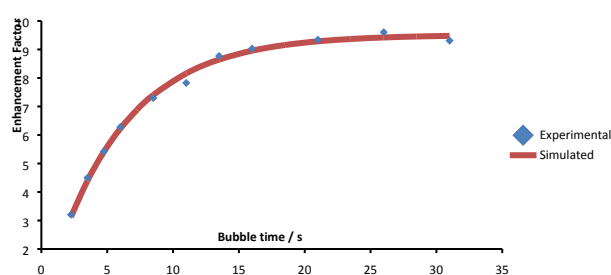

sFigure 15: Scatterplot showing the build-up of polarisation, normalized for the state selection process, at 50 G, for the  $S_Z S_Z$  term associated with the two chemically equivalent NCHCH resonances in free pdz using 4a.

sTable 32: Enhancements in the NCHCH double quantum resonance of free pdz using 4a, as a function of bubbling time.

| Bubble time / s | Enhancement Factor |         | Correction for observation of 1 of 4 terms | Correction for Receiver Gain (/64) |
|-----------------|--------------------|---------|--------------------------------------------|------------------------------------|
|                 | NCHCH              | Total   |                                            |                                    |
| 1.25            | 26 ± 1             | 51 ± 2  | 205 ± 8                                    | 3.2 ± 0.1                          |
| 2.5             | 36 ± 1             | 72 ± 2  | 288 ± 8                                    | 4.5 ± 0.1                          |
| 3.75            | 43 ± 1             | 87 ± 2  | 347 ± 8                                    | 5.4 ± 0.1                          |
| 5               | 50 ± 1             | 100 ± 2 | 402 ± 8                                    | 6.3 ± 0.1                          |
| 7.5             | 58 ± 1             | 117 ± 2 | 467 ± 8                                    | 7.3 ± 0.1                          |
| 10              | 63 ± 1             | 125 ± 2 | 501 ± 8                                    | 7.8 ± 0.1                          |
| 12.5            | 70 ± 1             | 140 ± 2 | 561 ± 8                                    | 8.8 ± 0.1                          |
| 15              | 72 ± 1             | 144 ± 2 | 578 ± 8                                    | 9.0 ± 0.1                          |
| 20              | 75 ± 1             | 149 ± 2 | 598 ± 8                                    | 9.3 ± 0.1                          |
| 25              | 77 ± 1             | 154 ± 2 | 615 ± 8                                    | 9.6 ± 0.1                          |
| 30              | 74 ± 1             | 149 ± 2 | 596 ± 8                                    | 9.3 ± 0.1                          |

Pyridazine Single Quantum coherences, at 65 G.

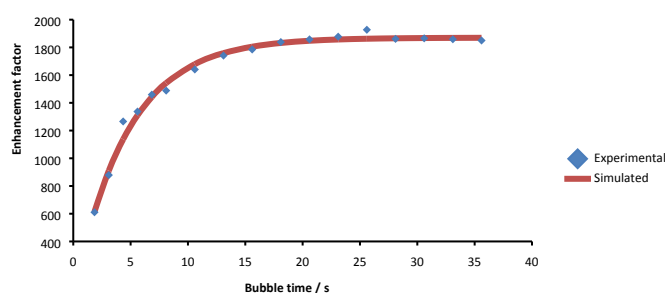

sFigure 16: Scatterplot showing the build-up of polarisation, normalized for the state selection process, at 65 G, for single quantum coherence resonances in free pdz using 4a.

sTable 33: Enhancements in the single quantum coherence resonances of free pdz using 4a, as a function of bubbling time.

| Bubble time / s | Enhancement Factor |         |         | Correction for observation of 1 of 2 terms | Correction for Receiver Gain (/1) |
|-----------------|--------------------|---------|---------|--------------------------------------------|-----------------------------------|
|                 | NCH                | NCHCH   | Total   |                                            |                                   |
| 1.25            | 93 ± 2             | 59 ± 1  | 305 ± 4 | 611 ± 8                                    | 611 ± 8                           |
| 2.5             | 134 ± 2            | 85 ± 1  | 439 ± 4 | 879 ± 8                                    | 879 ± 8                           |
| 3.75            | 185 ± 2            | 131 ± 1 | 632 ± 4 | 1266 ± 8                                   | 1266 ± 8                          |
| 5               | 194 ± 2            | 140 ± 1 | 669 ± 4 | 1337 ± 8                                   | 1337 ± 8                          |
| 6.25            | 212 ± 2            | 153 ± 1 | 730 ± 4 | 1459 ± 8                                   | 1459 ± 8                          |
| 7.5             | 214 ± 2            | 158 ± 1 | 744 ± 4 | 1488 ± 8                                   | 1488 ± 8                          |
| 10              | 232 ± 2            | 179 ± 1 | 820 ± 4 | 1641 ± 8                                   | 1641 ± 8                          |
| 12.5            | 247 ± 2            | 188 ± 1 | 870 ± 4 | 1741 ± 8                                   | 1741 ± 8                          |
| 15              | 251 ± 2            | 195 ± 1 | 893 ± 4 | 1785 ± 8                                   | 1785 ± 8                          |
| 17.5            | 256 ± 2            | 204 ± 1 | 919 ± 4 | 1839 ± 8                                   | 1839 ± 8                          |
| 20              | 262 ± 2            | 202 ± 1 | 929 ± 4 | 1858 ± 8                                   | 1858 ± 8                          |
| 22.5            | 262 ± 2            | 207 ± 1 | 939 ± 4 | 1877 ± 8                                   | 1877 ± 8                          |
| 25              | 268 ± 2            | 214 ± 1 | 964 ± 4 | 1927 ± 8                                   | 1927 ± 8                          |
| 27.5            | 258 ± 2            | 207 ± 1 | 931 ± 4 | 1861 ± 8                                   | 1861 ± 8                          |
| 30              | 261 ± 2            | 205 ± 1 | 933 ± 4 | 1865 ± 8                                   | 1865 ± 8                          |

Pyridazine double quantum coherences, at 30 G.

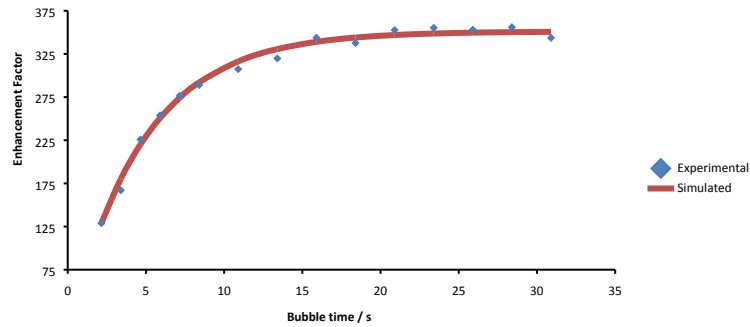

sFigure 17: Scatterplot showing the build-up of polarisation, normalized for the state selection process, at 30 G, for double quantum coherence resonances in free pdz using 4a.

sTable 34: Enhancements in the double quantum coherence resonances of free pdz using 4a, as a function of bubbling time.

| Bubble time / s | Enhancement Factor |         |           | Correction for observation of 1 of 4 terms | Correction for Receiver Gain (/16) |
|-----------------|--------------------|---------|-----------|--------------------------------------------|------------------------------------|
|                 | NCH                | NCHCH   | Total     |                                            |                                    |
| 1.25            | 122 ± 6            | 136 ± 7 | 520 ± 20  | 2060 ± 80                                  | 129 ± 5                            |
| 2.5             | 158 ± 6            | 176 ± 7 | 670 ± 20  | 2670 ± 80                                  | 167 ± 5                            |
| 3.75            | 214 ± 6            | 238 ± 7 | 900 ± 20  | 3620 ± 80                                  | 226 ± 5                            |
| 5               | 239 ± 6            | 268 ± 7 | 1010 ± 20 | 4060 ± 80                                  | 254 ± 5                            |
| 6.25            | 261 ± 6            | 292 ± 7 | 1110 ± 20 | 4420 ± 80                                  | 276 ± 5                            |
| 7.5             | 273 ± 6            | 305 ± 7 | 1160 ± 20 | 4620 ± 80                                  | 289 ± 5                            |
| 10              | 290 ± 6            | 325 ± 7 | 1230 ± 20 | 4920 ± 80                                  | 307 ± 5                            |
| 12.5            | 302 ± 6            | 338 ± 7 | 1280 ± 20 | 5120 ± 80                                  | 320 ± 5                            |
| 15              | 325 ± 6            | 363 ± 7 | 1380 ± 20 | 5500 ± 80                                  | 344 ± 5                            |
| 17.5            | 319 ± 6            | 357 ± 7 | 1350 ± 20 | 5400 ± 80                                  | 338 ± 5                            |
| 20              | 333 ± 6            | 372 ± 7 | 1410 ± 20 | 5640 ± 80                                  | 353 ± 5                            |
| 22.5            | 335 ± 6            | 375 ± 7 | 1420 ± 20 | 5690 ± 80                                  | 355 ± 5                            |
| 25              | 334 ± 6            | 373 ± 7 | 1410 ± 20 | 5650 ± 80                                  | 353 ± 5                            |
| 27.5            | 336 ± 6            | 376 ± 7 | 1420 ± 20 | 5700 ± 80                                  | 356 ± 5                            |
| 30              | 325 ± 6            | 362 ± 7 | 1370 ± 20 | 5500 ± 80                                  | 344 ± 5                            |

## Pyridazine triple quantum coherences, at 120 G.

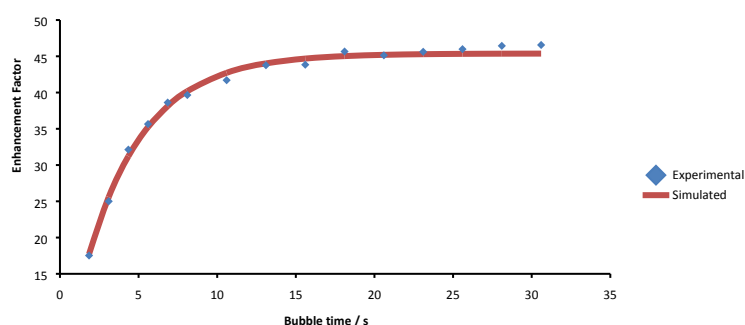

sFigure 18: Scatterplot showing the build-up of polarisation, normalized for the state selection process, at 120 G, for triple quantum coherence resonances in free pdz using 4a.

sTable 35: Enhancements in the triple quantum coherence resonances of free pdz using 4a, as a function of bubbling time.

| Bubble time /<br>s | Enhancement Factor |          |          | Correction for observation of 1 of<br>8 terms | Correction for Receiver Gain<br>(/114) |
|--------------------|--------------------|----------|----------|-----------------------------------------------|----------------------------------------|
|                    | NCH                | NCHCH    | Total    |                                               |                                        |
| 1.25               | 80 ± 10            | 40 ± 10  | 250 ± 30 | 2000 ± 200                                    | 18 ± 2                                 |
| 2.5                | 120 ± 10           | 60 ± 10  | 360 ± 30 | 2900 ± 200                                    | 25 ± 2                                 |
| 3.75               | 150 ± 10           | 80 ± 10  | 460 ± 30 | 3700 ± 200                                    | 32 ± 2                                 |
| 5                  | 160 ± 10           | 90 ± 10  | 510 ± 30 | 4100 ± 200                                    | 36 ± 2                                 |
| 6.25               | 180 ± 10           | 100 ± 10 | 550 ± 30 | 4400 ± 200                                    | 39 ± 2                                 |
| 7.5                | 180 ± 10           | 100 ± 10 | 570 ± 30 | 4500 ± 200                                    | 40 ± 2                                 |
| 10                 | 180 ± 10           | 110 ± 10 | 590 ± 30 | 4800 ± 200                                    | 42 ± 2                                 |
| 12.5               | 200 ± 10           | 120 ± 10 | 620 ± 30 | 5000 ± 200                                    | 44 ± 2                                 |
| 15                 | 200 ± 10           | 120 ± 10 | 620 ± 30 | 5000 ± 200                                    | 44 ± 2                                 |
| 17.5               | 200 ± 10           | 120 ± 10 | 650 ± 30 | 5200 ± 200                                    | 46 ± 2                                 |
| 20                 | 200 ± 10           | 120 ± 10 | 640 ± 30 | 5100 ± 200                                    | 45 ± 2                                 |
| 22.5               | 200 ± 10           | 120 ± 10 | 650 ± 30 | 5200 ± 200                                    | 46 ± 2                                 |
| 25                 | 200 ± 10           | 130 ± 10 | 660 ± 30 | 5200 ± 200                                    | 46 ± 2                                 |
| 27.5               | 210 ± 10           | 130 ± 10 | 660 ± 30 | 5300 ± 200                                    | 46 ± 2                                 |
| 30                 | 200 ± 10           | 130 ± 10 | 660 ± 30 | 5300 ± 200                                    | 47 ± 2                                 |

## Pyridazine quadruple quantum coherences, at 50 G.

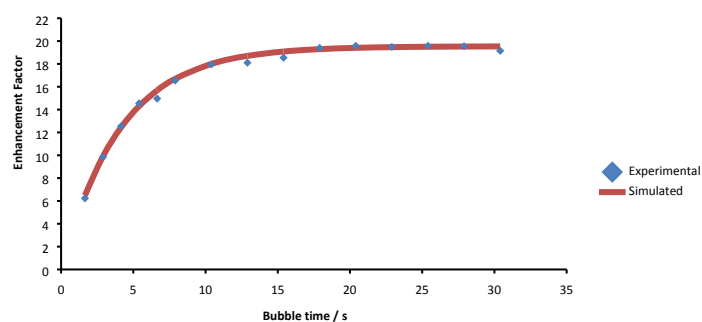

sFigure 19: Scatterplot showing the build-up of polarisation, normalized for the state selection process, at 50 G, for quadruple quantum coherence resonances in free pdz using 4a.

sTable 36: Enhancements in the quadruple quantum coherence resonances of free pdz using 4a, as a function of bubbling time.

| Bubble time /<br>s | Enhancement Factor |       |       | Correction for observation of 1 of<br>16 terms | Correction for Receiver Gain<br>(/2050) |
|--------------------|--------------------|-------|-------|------------------------------------------------|-----------------------------------------|
|                    | NCH                | NCHCH | Total |                                                |                                         |

|      |          |          |           |             |            |
|------|----------|----------|-----------|-------------|------------|
| 1.25 | 170 ± 10 | 230 ± 10 | 800 ± 30  | 12800 ± 500 | 6.2 ± 0.2  |
| 2.5  | 270 ± 10 | 370 ± 10 | 1260 ± 30 | 20200 ± 500 | 9.8 ± 0.2  |
| 3.75 | 340 ± 10 | 470 ± 10 | 1610 ± 30 | 25700 ± 500 | 12.5 ± 0.2 |
| 5    | 380 ± 10 | 550 ± 10 | 1860 ± 30 | 29800 ± 500 | 14.5 ± 0.2 |
| 6.25 | 400 ± 10 | 560 ± 10 | 1920 ± 30 | 30700 ± 500 | 15.0 ± 0.2 |
| 7.5  | 450 ± 10 | 620 ± 10 | 2120 ± 30 | 33900 ± 500 | 16.6 ± 0.2 |
| 10   | 480 ± 10 | 670 ± 10 | 2300 ± 30 | 36800 ± 500 | 18.0 ± 0.2 |
| 12.5 | 490 ± 10 | 670 ± 10 | 2320 ± 30 | 37100 ± 500 | 18.1 ± 0.2 |
| 15   | 490 ± 10 | 700 ± 10 | 2380 ± 30 | 38000 ± 500 | 18.5 ± 0.2 |
| 17.5 | 510 ± 10 | 730 ± 10 | 2490 ± 30 | 39800 ± 500 | 19.4 ± 0.2 |
| 20   | 520 ± 10 | 730 ± 10 | 2510 ± 30 | 40200 ± 500 | 19.6 ± 0.2 |
| 22.5 | 520 ± 10 | 730 ± 10 | 2500 ± 30 | 40000 ± 500 | 19.5 ± 0.2 |
| 25   | 520 ± 10 | 730 ± 10 | 2510 ± 30 | 40200 ± 500 | 19.6 ± 0.2 |
| 27.5 | 520 ± 10 | 730 ± 10 | 2510 ± 30 | 40100 ± 500 | 19.5 ± 0.2 |
| 30   | 520 ± 10 | 710 ± 10 | 2500 ± 30 | 39300 ± 500 | 19.1 ± 0.2 |

### Summary:

sTable 37: Rate constants of the build-up of polarisation with bubbling time into the magnetic states of free pdz using 4a.

| Magnetic states | $k_{obs}$ of polarisation build-up / $s^{-1}$ |
|-----------------|-----------------------------------------------|
| $I_z$           | 0.249 ± 0.007                                 |
| $S_z$           | 0.122 ± 0.005                                 |
| $S_z S_z$       | 0.177 ± 0.005                                 |
| SQ              | 0.215 ± 0.007                                 |
| DQ              | 0.212 ± 0.006                                 |
| TQ              | 0.268 ± 0.007                                 |
| QQ              | 0.244 ± 0.005                                 |

### Phthalazine NCH, at 65 G.

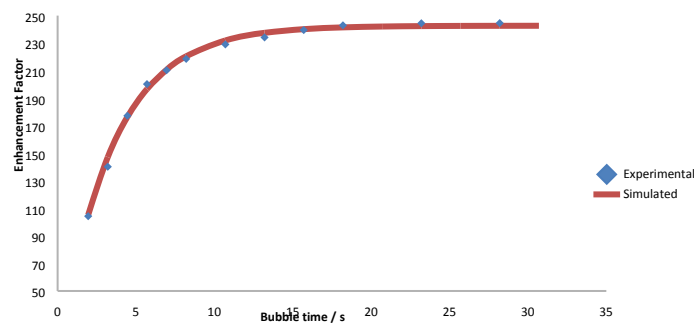

sFigure 20: Scatterplot showing the build-up of polarisation, normalized for the state selection process, at 65 G, for the NCH resonance in free phth using 4b.

sTable 38: Enhancements in the NCH resonances of free phth using 4b, as a function of bubbling time.

| Bubble time / s | Enhancement Factor |         | Correction for Receiver Gain (1) |
|-----------------|--------------------|---------|----------------------------------|
|                 | NCH                | Total   |                                  |
| 1.25            | 52 ± 1             | 104 ± 2 | 104 ± 2                          |
| 2.5             | 70 ± 1             | 140 ± 2 | 140 ± 2                          |
| 3.75            | 89 ± 1             | 177 ± 2 | 177 ± 2                          |
| 5               | 100 ± 1            | 200 ± 2 | 200 ± 2                          |
| 6.25            | 105 ± 1            | 210 ± 2 | 210 ± 2                          |
| 7.5             | 109 ± 1            | 219 ± 2 | 219 ± 2                          |
| 10              | 115 ± 1            | 229 ± 2 | 229 ± 2                          |
| 12.5            | 117 ± 1            | 234 ± 2 | 234 ± 2                          |
| 15              | 120 ± 1            | 240 ± 2 | 240 ± 2                          |
| 17.5            | 121 ± 1            | 243 ± 2 | 243 ± 2                          |
| 22.5            | 122 ± 1            | 244 ± 2 | 244 ± 2                          |

|      |         |         |         |
|------|---------|---------|---------|
| 27.5 | 122 ± 1 | 245 ± 2 | 245 ± 2 |
|------|---------|---------|---------|

Phthalazine NCHCCH, at 65 G.

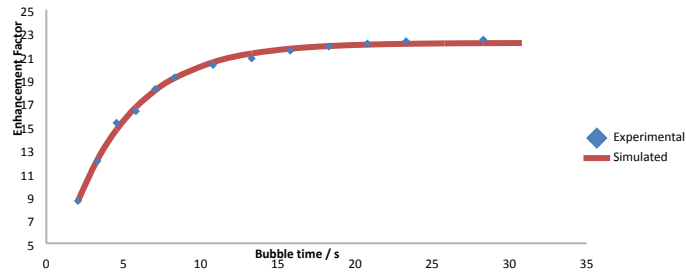

sFigure 21: Scatterplot showing the build-up of polarisation, normalized for the state selection process, at 65 G, for the NCHCCH resonance in free phth using 4b.

sTable 39: Enhancements in the NCHCCH resonances of free phth using 4b, as a function of bubbling time.

| Bubble time / s | Enhancement Factor |         | Correction for Receiver Gain (/16) |
|-----------------|--------------------|---------|------------------------------------|
|                 | NCHCCH             | Total   |                                    |
| 1.25            | 69 ± 2             | 138 ± 4 | 8.6 ± 0.2                          |
| 2.5             | 96 ± 2             | 192 ± 4 | 12.0 ± 0.2                         |
| 3.75            | 123 ± 2            | 245 ± 4 | 15.3 ± 0.2                         |
| 5               | 130 ± 2            | 261 ± 4 | 16.3 ± 0.2                         |
| 6.25            | 146 ± 2            | 291 ± 4 | 18.2 ± 0.2                         |
| 7.5             | 154 ± 2            | 307 ± 4 | 19.2 ± 0.2                         |
| 10              | 162 ± 2            | 324 ± 4 | 20.3 ± 0.2                         |
| 12.5            | 167 ± 2            | 333 ± 4 | 20.8 ± 0.2                         |
| 15              | 172 ± 2            | 344 ± 4 | 21.5 ± 0.2                         |
| 17.5            | 175 ± 2            | 350 ± 4 | 21.8 ± 0.2                         |
| 20              | 177 ± 2            | 354 ± 4 | 22.1 ± 0.2                         |
| 22.5            | 178 ± 2            | 357 ± 4 | 22.3 ± 0.2                         |
| 27.5            | 180 ± 2            | 359 ± 4 | 22.4 ± 0.2                         |

Phthalazine NCHCCHCH, at 65 G.

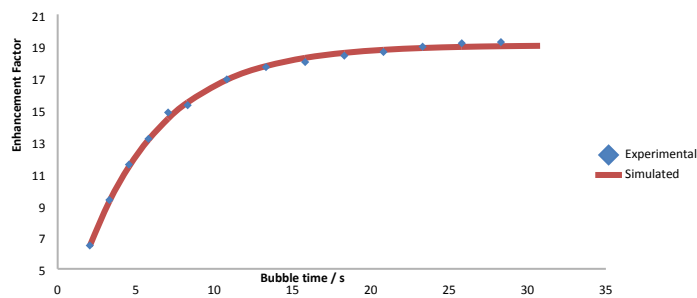

sFigure 21: Scatterplot showing the build-up of polarisation, normalized for the state selection process, at 65 G, for the NCHCCHCH resonance in free phth using 4b.

sTable 40: Enhancements in the NCHCCHCH resonances of free phth using 4b, as a function of bubbling time.

| Bubble time / s | Enhancement Factor |         | Correction for Receiver Gain (/16) |
|-----------------|--------------------|---------|------------------------------------|
|                 | NCHCCHCH           | Total   |                                    |
| 1.25            | 51.7 ± 0.7         | 103 ± 1 | 6.47 ± 0.06                        |
| 2.5             | 74.6 ± 0.7         | 149 ± 1 | 9.33 ± 0.06                        |
| 3.75            | 92.4 ± 0.7         | 185 ± 1 | 11.55 ± 0.06                       |
| 5               | 105.4 ± 0.7        | 211 ± 1 | 13.18 ± 0.06                       |
| 6.25            | 118.7 ± 0.7        | 237 ± 1 | 14.83 ± 0.06                       |

|      |             |         |              |
|------|-------------|---------|--------------|
| 7.5  | 122.3 ± 0.7 | 245 ± 1 | 15.29 ± 0.06 |
| 10   | 135.3 ± 0.7 | 271 ± 1 | 16.91 ± 0.06 |
| 12.5 | 141.5 ± 0.7 | 283 ± 1 | 17.68 ± 0.06 |
| 15   | 144.0 ± 0.7 | 288 ± 1 | 18.00 ± 0.06 |
| 17.5 | 147.2 ± 0.7 | 294 ± 1 | 18.40 ± 0.06 |
| 20   | 149.0 ± 0.7 | 298 ± 1 | 18.63 ± 0.06 |
| 22.5 | 151.8 ± 0.7 | 304 ± 1 | 18.97 ± 0.06 |
| 25   | 153.5 ± 0.7 | 307 ± 1 | 19.18 ± 0.06 |
| 27.5 | 154.0 ± 0.7 | 308 ± 1 | 19.26 ± 0.06 |

### Phthalazine Single quantum coherences

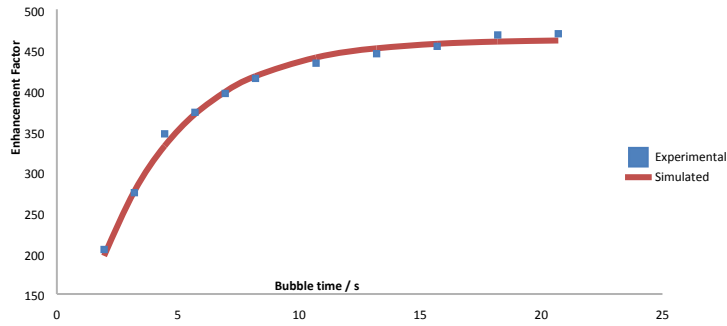

sFigure 22: Scatterplot showing the build-up of polarisation, normalized for the state selection process, at 65 G, for single quantum coherence resonances in free phth using 4b.

sTable 41: Enhancements in the single quantum coherence resonances of free phth using 4b, as a function of bubbling time.

| Bubble time / s | Enhancement Factor |            |            | Total   | Correction for detection of 1 of 2 terms | Correction for Receiver Gain (/4) |
|-----------------|--------------------|------------|------------|---------|------------------------------------------|-----------------------------------|
|                 | NCH                | NCHCCH     | NCHCCHCH   |         |                                          |                                   |
| 1.25            | 155 ± 3            | 29.7 ± 0.7 | 20.2 ± 0.5 | 409 ± 6 | 820 ± 10                                 | 205 ± 2                           |
| 2.5             | 205 ± 3            | 40.9 ± 0.7 | 28.3 ± 0.5 | 549 ± 6 | 1100 ± 10                                | 275 ± 2                           |
| 3.75            | 256 ± 3            | 53.3 ± 0.7 | 37.5 ± 0.5 | 694 ± 6 | 1390 ± 10                                | 347 ± 2                           |
| 5               | 274 ± 3            | 58.0 ± 0.7 | 41.7 ± 0.5 | 747 ± 6 | 1490 ± 10                                | 373 ± 2                           |
| 6.25            | 289 ± 3            | 62.1 ± 0.7 | 45.4 ± 0.5 | 793 ± 6 | 1590 ± 10                                | 397 ± 2                           |
| 7.5             | 301 ± 3            | 65.7 ± 0.7 | 48.4 ± 0.5 | 830 ± 6 | 1660 ± 10                                | 415 ± 2                           |
| 10              | 312 ± 3            | 69.6 ± 0.7 | 52.1 ± 0.5 | 867 ± 6 | 1730 ± 10                                | 434 ± 2                           |
| 12.5            | 319 ± 3            | 71.7 ± 0.7 | 54.6 ± 0.5 | 890 ± 6 | 1780 ± 10                                | 445 ± 2                           |
| 15              | 324 ± 3            | 73.8 ± 0.7 | 56.6 ± 0.5 | 909 ± 6 | 1820 ± 10                                | 455 ± 2                           |
| 17.5            | 333 ± 3            | 76.3 ± 0.7 | 59.1 ± 0.5 | 937 ± 6 | 1870 ± 10                                | 468 ± 2                           |
| 20              | 334 ± 3            | 76.7 ± 0.7 | 59.6 ± 0.5 | 940 ± 6 | 1880 ± 10                                | 470 ± 2                           |

### Phthalazine double quantum coherences, at 65 G.

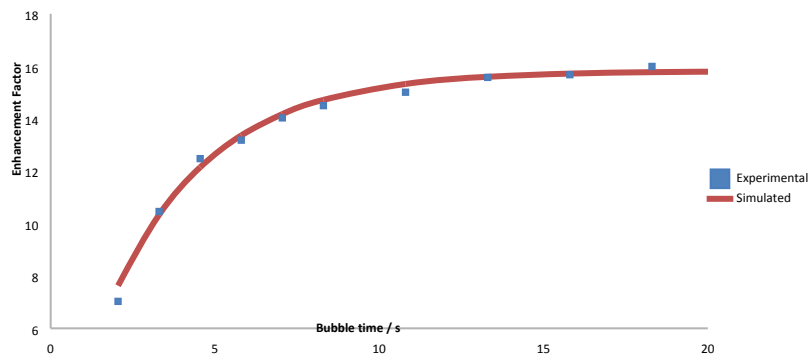

sFigure 23: Scatterplot showing the build-up of polarisation, normalized for the state selection process, at 65 G, for double quantum coherence resonances in free phth using 4b.

**sTable 42: Enhancements in the double quantum coherence resonances of free pthh using 4b, as a function of bubbling time.**

| Bubble time<br>/s | Enhancement Factor |        |          |          | Correction for detection<br>of 1 of 4 terms | Correction for Receiver<br>Gain (/128) |
|-------------------|--------------------|--------|----------|----------|---------------------------------------------|----------------------------------------|
|                   | NCH                | NCHCCH | NCHCCHCH | Total    |                                             |                                        |
| 1.25              | 20 ± 2             | 38 ± 2 | 55 ± 4   | 220 ± 10 | 900 ± 40                                    | 7.0 ± 0.3                              |
| 2.5               | 33 ± 2             | 53 ± 2 | 81 ± 4   | 330 ± 10 | 1340 ± 40                                   | 10.5 ± 0.3                             |
| 3.75              | 41 ± 2             | 63 ± 2 | 96 ± 4   | 400 ± 10 | 1600 ± 40                                   | 12.5 ± 0.3                             |
| 5                 | 44 ± 2             | 65 ± 2 | 102 ± 4  | 420 ± 10 | 1690 ± 40                                   | 13.2 ± 0.3                             |
| 6.25              | 49 ± 2             | 68 ± 2 | 108 ± 4  | 450 ± 10 | 1800 ± 40                                   | 14.0 ± 0.3                             |
| 7.5               | 51 ± 2             | 70 ± 2 | 111 ± 4  | 460 ± 10 | 1860 ± 40                                   | 14.5 ± 0.3                             |
| 10                | 54 ± 2             | 72 ± 2 | 114 ± 4  | 480 ± 10 | 1920 ± 40                                   | 15.0 ± 0.3                             |
| 12.5              | 56 ± 2             | 74 ± 2 | 119 ± 4  | 500 ± 10 | 2000 ± 40                                   | 15.6 ± 0.3                             |
| 15                | 56 ± 2             | 75 ± 2 | 120 ± 4  | 500 ± 10 | 2010 ± 40                                   | 15.7 ± 0.3                             |
| 17.5              | 58 ± 2             | 76 ± 2 | 122 ± 4  | 510 ± 10 | 2050 ± 40                                   | 16.0 ± 0.3                             |
| 20                | 59 ± 2             | 76 ± 2 | 123 ± 4  | 520 ± 10 | 2060 ± 40                                   | 16.1 ± 0.3                             |

### Summary:

**Table 43: Rate constants of the build-up of polarisation with bubbling time into the magnetic states of free pthh using 4b.**

| Magnetic states | k <sub>obs</sub> of polarisation build-up / s <sup>-1</sup> |
|-----------------|-------------------------------------------------------------|
| I <sub>z</sub>  | 0.292 ± 0.006                                               |
| S <sub>z</sub>  | 0.240 ± 0.006                                               |
| T <sub>z</sub>  | 0.201 ± 0.003                                               |
| SQ              | 0.28 ± 0.01                                                 |
| DQ              | 0.32 ± 0.01                                                 |

## 10. Calculation of T<sub>1</sub> values for magnetic states in pyridazine and phthalazine

A 2-D inversion recovery experiment was collected to calculate the T<sub>1</sub> values of single quantum terms. The intensity of the signals at a given time were calculated and plotted. The signal intensity is proportional to the T<sub>1</sub> values according to:

$$M_{\tau} = M_0 [1 - 2 \exp \frac{-\tau}{T_1}]$$

Where  $M_{\tau}$  is the magnetisation (measured using the integrals) after a delay of time  $\tau$ , and  $M_0$  is the magnetisation after a delay of time  $\tau \gg T_1$ . Solver was used to simulate the data, by minimising the root mean square between calculated data and experimental data, by allowing the T<sub>1</sub> and  $M_0$  values to change. The results are shown in the table and the plots below.

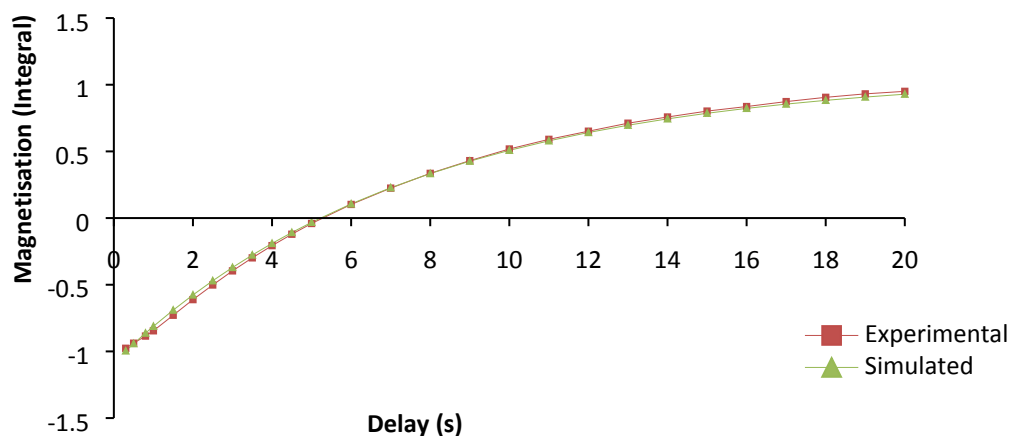

Figure 24: Plot to show the intensity of free pyridazine signal  $\delta$  9.28 as a function of time in an inversion recovery experiment.

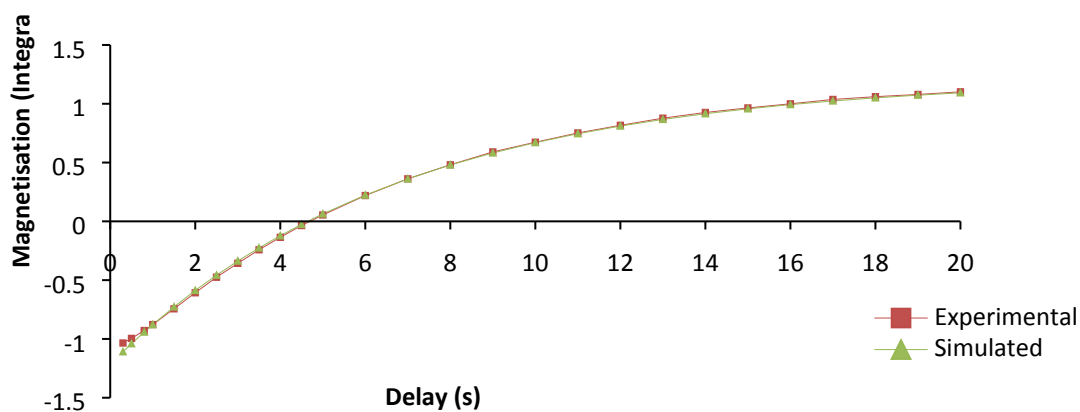

Figure 25: Plot to show the intensity of free pyridazine signal  $\delta$  7.78 as a function of time in an inversion recovery experiment.

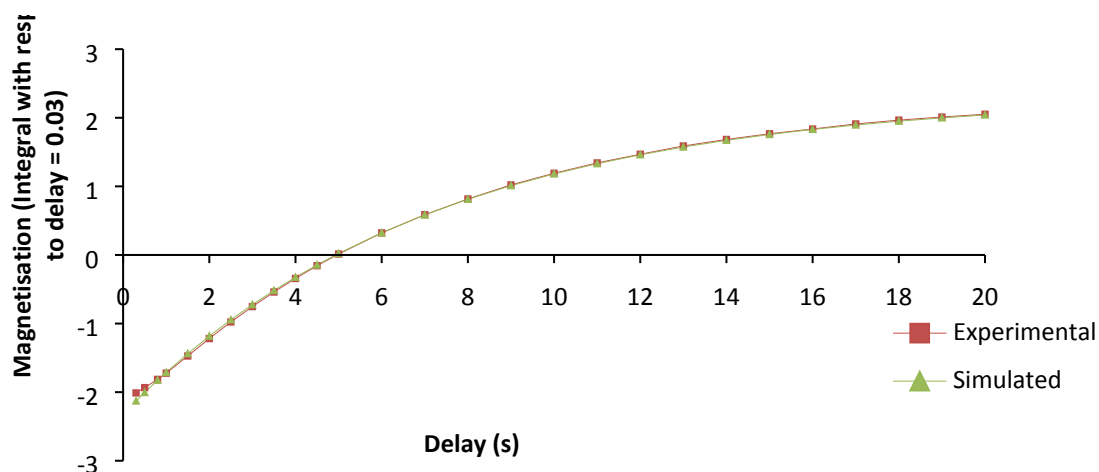

Figure 26: Plot to show the intensity of the sum of the free pyridazine signals as a function of time in an inversion recovery experiment.



sTable 44: The calculated  $T_1$  values for specific magnetic states of pyridazine.

| $^1\text{H}$ NMR Signal | $T_1$ (s)         | $M_0$ |
|-------------------------|-------------------|-------|
| 9.28                    | $7.613 \pm 0.001$ | 1.08  |
| 7.78                    | $6.697 \pm 0.001$ | 1.22  |
| SQ                      | $7.118 \pm 0.001$ | 2.32  |

The  $T_1$  value of the double quantum  $H_B H_B'$  signal was also calculated by selectively creating the state and then collecting  $^1\text{H}$  NMR spectra after specific, set times. The data was fitted to the formula below (this is slightly different as it is not an inversion recovery experiment):

$$M_\tau = M_0 [2 \exp^{-\frac{\tau}{T_1}}]$$

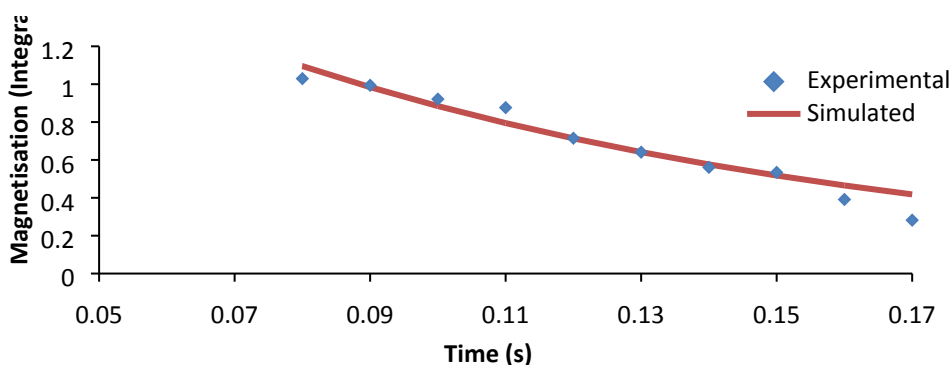

sFigure 27: Plot to show the intensity of the double quantum  $H_B H_B'$  free pyridazine signal at  $\delta$  7.78 as a function of time in an inversion recovery experiment.

The  $T_1$  value calculated from this fitting is  $0.086 \text{ s} \pm 0.001 \text{ s}$ , which is far quicker than the other states. The rate of polarisation build-up can now be corrected for the  $T_1$  relaxation:

sTable 45: The calculated rates of polarisation build-up for specific magnetic states of pyridazine.

| State probed | Rate of polarisation build-up / $\text{s}^{-1}$ |
|--------------|-------------------------------------------------|
| $I_z$        | $0.380 \pm 0.007$                               |
| $S_z$        | $0.271 \pm 0.005$                               |
| $S_z S_z$    | $11.79 \pm 0.005$                               |
| SQ           | $0.356 \pm 0.007$                               |
| DQ           | $12.94 \pm 0.006$                               |

Although the double quantum states relax much more quickly than the single quantum, they polarise much more quickly and this counteracts the relaxation, allowing the states to become populated.

The same 2-D inversion recovery experiment was collected for the analogous phthalazine sample. The results are shown in the table and the plots below:

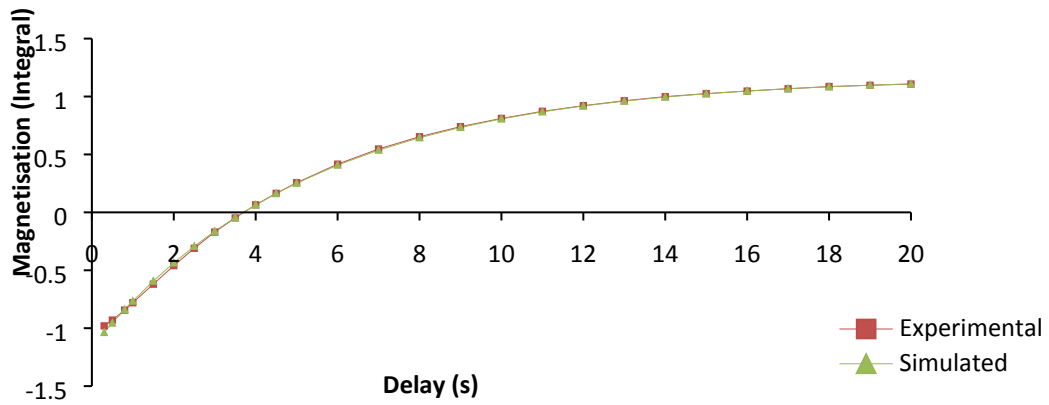

sFigure 28: Plot to show the intensity of the phthalazine signal at  $\delta$  9.64 as a function of time in an inversion recovery experiment.

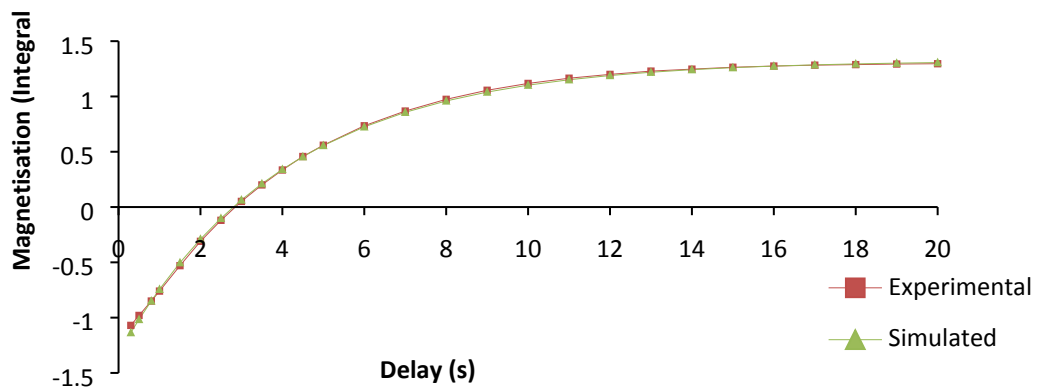

sFigure 29: Plot to show the intensity of the phthalazine signal at  $\delta$  8.20 as a function of time in an inversion recovery experiment.

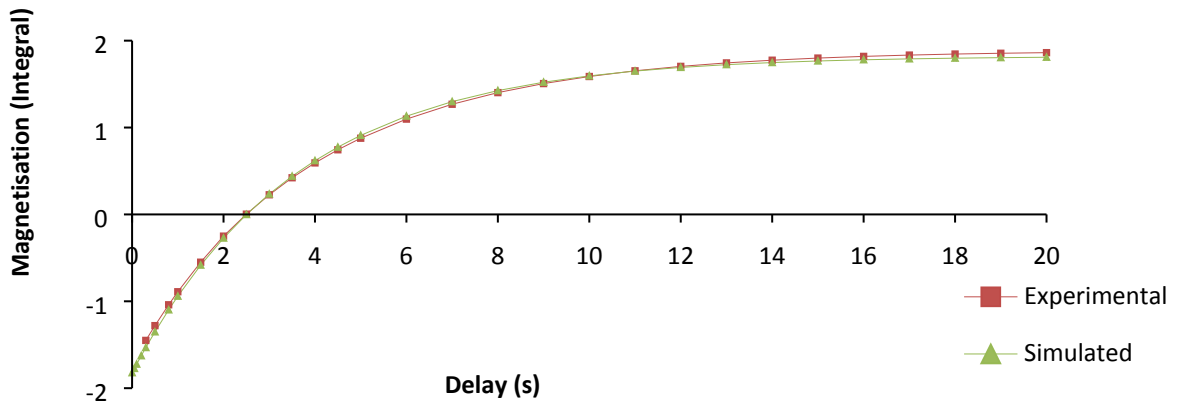

sFigure 30: Plot to show the intensity of the phthalazine signal at  $\delta$  8.10 as a function of time in an inversion recovery experiment.

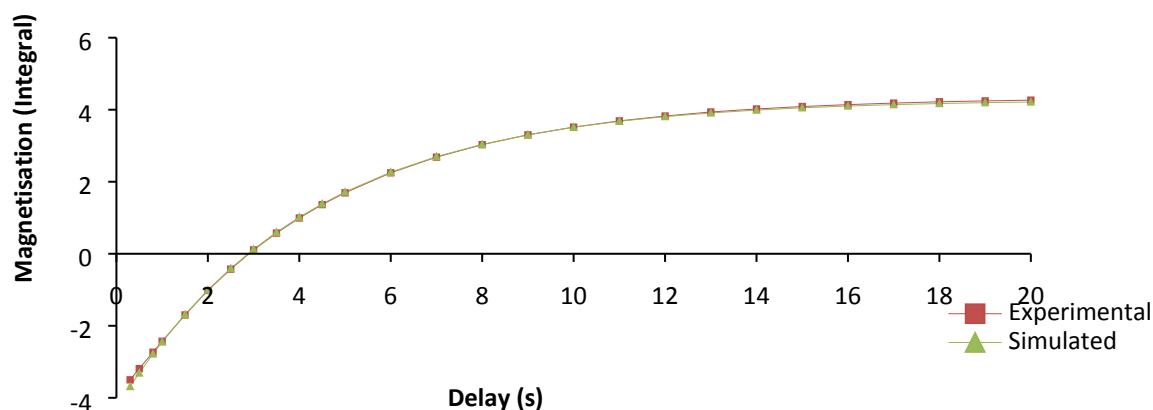

sFigure 31: Plot to show the intensity of the sum of the free phthalazine signals as a function of time in an inversion recovery experiment.

sTable 46: The calculated  $T_1$  values for specific magnetic states of phthalazine.

| $^1\text{H}$ NMR Signal | $T_1$ (s)           | $M_0$ |
|-------------------------|---------------------|-------|
| 9.64                    | $5.335 \pm 0.001$   | 1.16  |
| 8.20                    | $4.0375 \pm 0.0009$ | 1.32  |
| 8.10                    | $3.6153 \pm 0.0007$ | 1.83  |
| SQ                      | $4.1523 \pm 0.0007$ | 4.29  |

The rate of polarisation build-up can now be corrected for the  $T_1$  relaxation.

sTable 47: The calculated rates of polarisation build-up for specific magnetic states of phthalazine.

| State probed | Rate of polarisation build-up / $\text{s}^{-1}$ |
|--------------|-------------------------------------------------|
| $I_z$        | $0.477 \pm 0.006$                               |
| $S_z$        | $0.488 \pm 0.006$                               |
| $T_z$        | $0.476 \pm 0.003$                               |
| SQ           | $0.52 \pm 0.01$                                 |

## 11. Model for ligand exchange in 4a and 4b

The pathways available to transfer polarisation from a selectively-excited IrNNCH proton to an IrNCH or free NCH proton are shown below, where  $K_a$  is the rate of association,  $K_d$  is the rate of dissociation, and  $K_h$  is the rate of the haptotropic shift.

sScheme 2: Exchange pathways available to an IrNNCH proton.

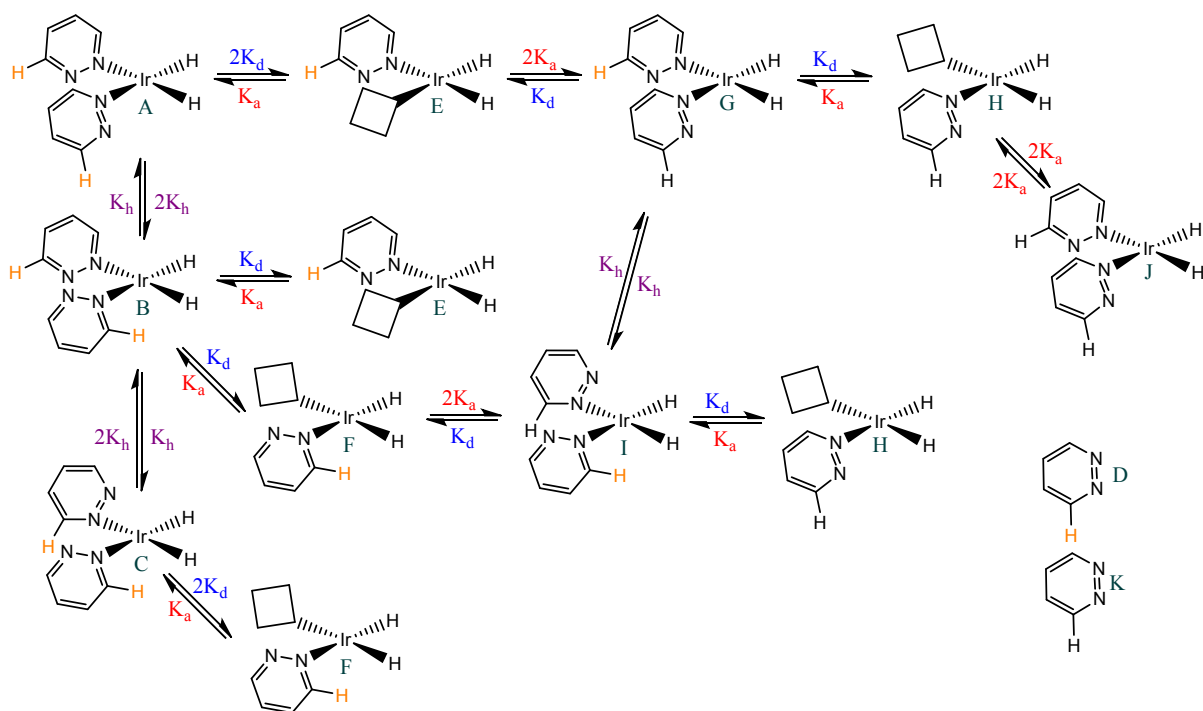

The concentration of each species, after time  $t$ , can be calculated from the formulae shown:

$$[A]_t = [A]_0 - (2K_d[A])t + (K_a[E][D])t + (K_h[B])t$$

$$[B]_t = [B]_0 - (2K_h[B])t - (2K_d[B])t + (2K_h[A])t + (2K_h[C])t + (K_a[E][D])t + (K_a[F][D])t$$

$$[C]_t = [C]_0 - (2K_h[C])t - (2K_d[C])t + (K_h[B])t + (K_a[F][D])t$$

$$[D]_t = [D]_0 - (2K_a[E][D])t - 2K_a[F][D]t - (2K_a[H][D])t + (2K_d[A])t + (2K_d[B])t + (K_d[I])t$$

$$[E]_t = [E]_0 - (2K_a[E][K])t - (2K_a[E][D])t + (2K_d[A])t + (K_d[G])t + (K_d[B])t$$

$$[F]_t = [F]_0 - (2K_a[F][K])t - (2K_a[F][D])t + (2K_d[C])t + (K_d[B])t + (K_d[I])t$$

$$[G]_t = [G]_0 - (2K_d[G])t - (K_h[G])t + (2K_a[E][K])t + (K_a[H][D])t + (K_h[I])t$$

$$[H]_t = [H]_0 - (2K_a[H][D])t - (2K_a[H][K])t + (K_d[G])t + (K_d[I])t + (2K_d[J])t$$

$$[I]_t = [I]_0 - (2K_d[I])t - (K_h[I])t + (K_a[H][D])t + (2K_a[F][K])t + (K_h[G])t$$

$$[J]_t = [J]_0 - (2K_d[J])t + (2K_a[H][K])t$$

$$[K]_t = [K]_0 - (2K_a[E][K])t - (2K_a[F][K])t - (2K_a[H][K])t + (2K_d[J])t + (2K_d[G])t + (K_d[I])t$$

Microsoft Excel's Solver was used to simulate the data, by minimising the root mean square between calculated data and experimental data, by allowing the  $K_a$ ,  $K_d$ , and  $K_h$  values to change.

## 12. Useful $^1\text{H}$ NMR spectra

**2a with free pdz(\*), methanol- $d_4$ , 500 MHz**

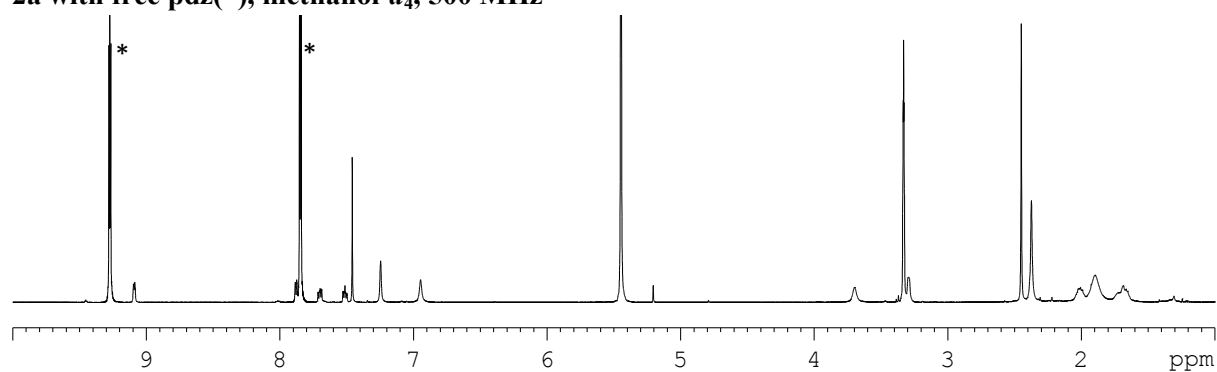

**2b with free phth(\*), methanol- $d_4$ , 500 MHz**

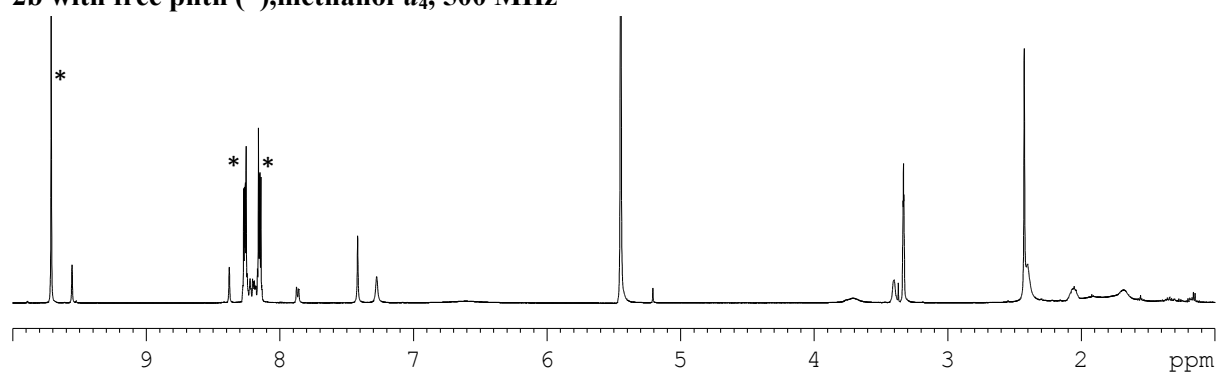

**3a with free pdz(\*), methanol- $d_4$ , 500 MHz**

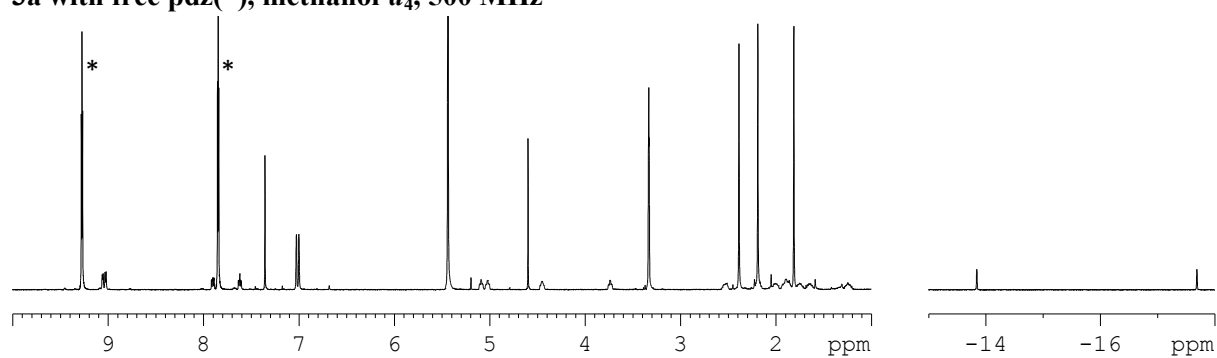

**3b with free phth(\*), methanol- $d_4$ , 500 MHz**

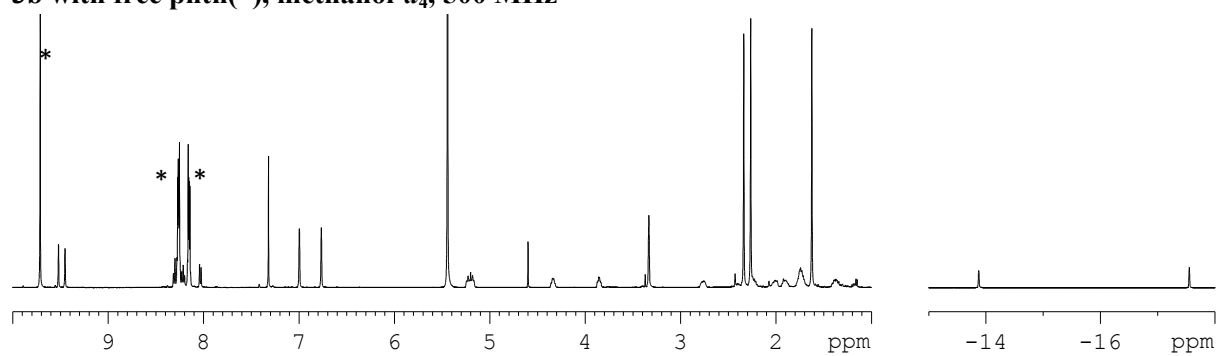

**4a with free pdz(\*), methanol-*d*<sub>4</sub>, 500 MHz**

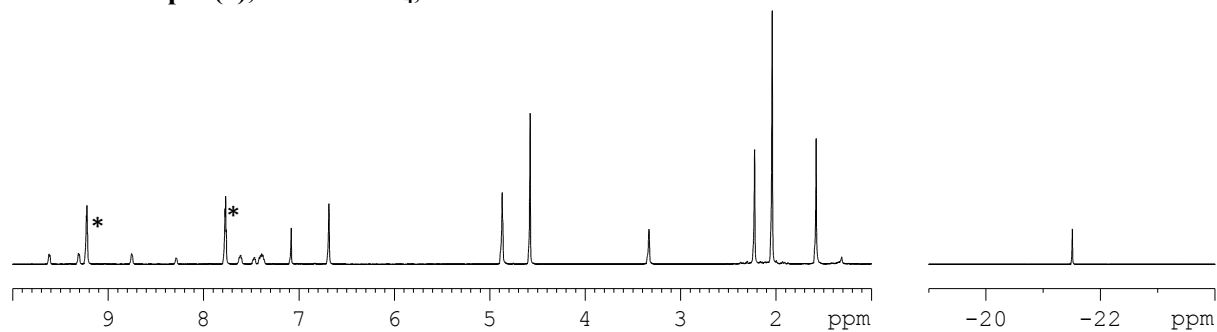

**4b with free phth(\*), methanol-*d*<sub>4</sub>, 500 MHz**

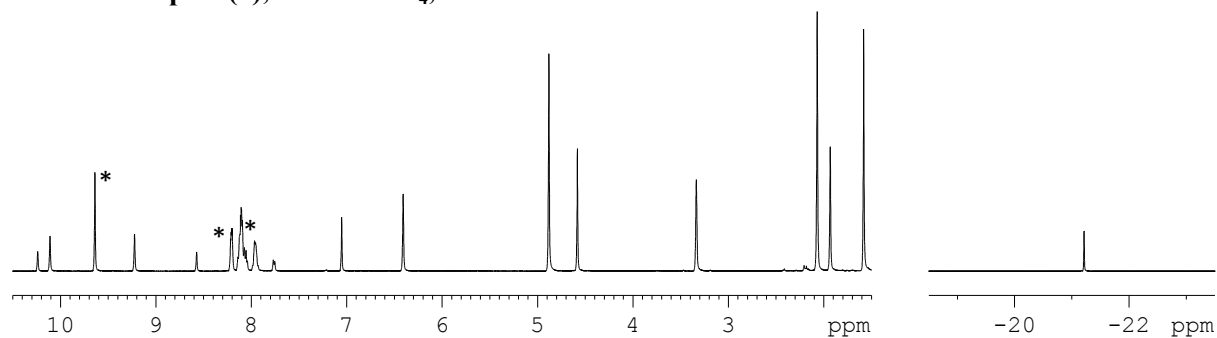

**4a with free pdz(\*), methanol-*d*<sub>4</sub>, 500 MHz, polarised by SABRE**

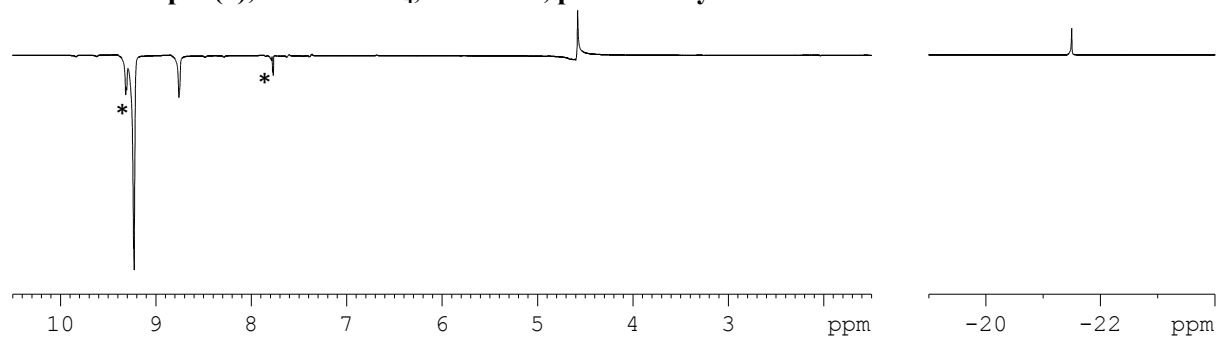

**4b with free phth(\*), methanol-*d*<sub>4</sub>, 500 MHz, polarised by SABRE**

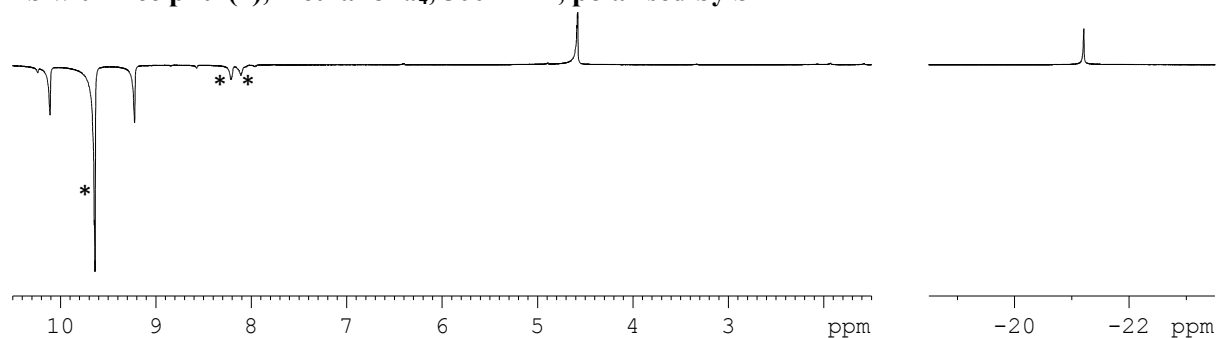

**4a with free pdz(\*), ethanol-*d*<sub>6</sub>, 400 MHz, polarised by SABRE**

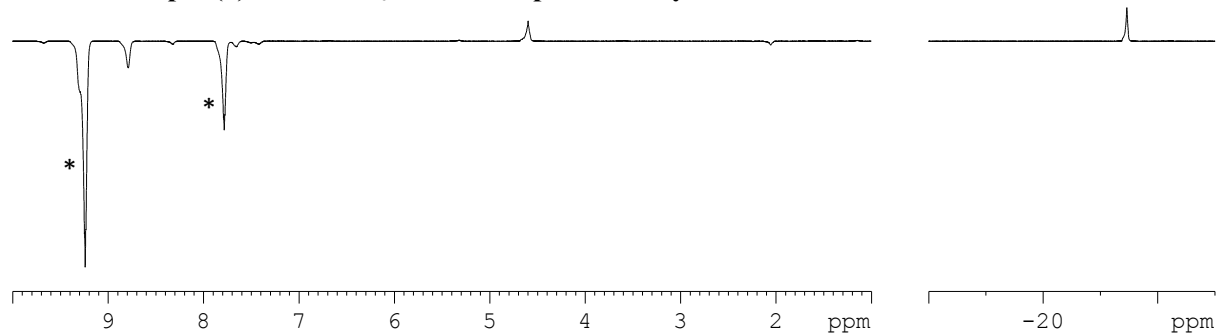

**4b with free phth(\*), ethanol-*d*<sub>6</sub>, 400 MHz, polarised by SABRE**

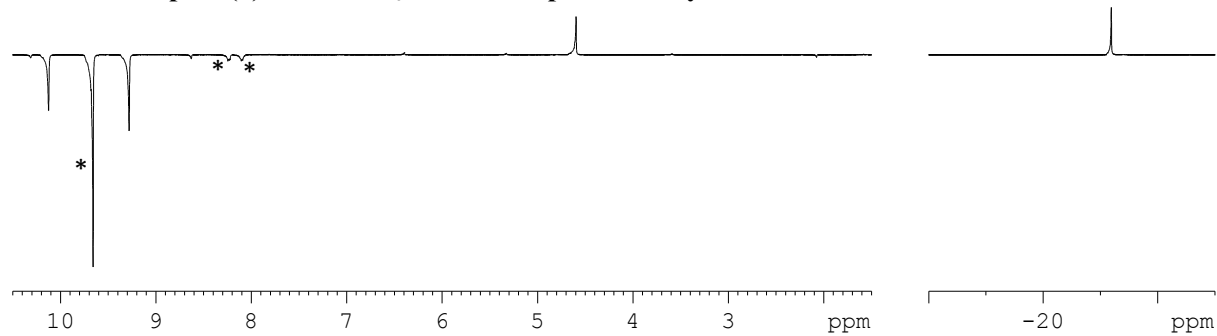

**Polarisation of 5-aminophthalazine (\*) by SABRE with 1 and *p*-H<sub>2</sub>, methanol-*d*<sub>6</sub>, 400 MHz**

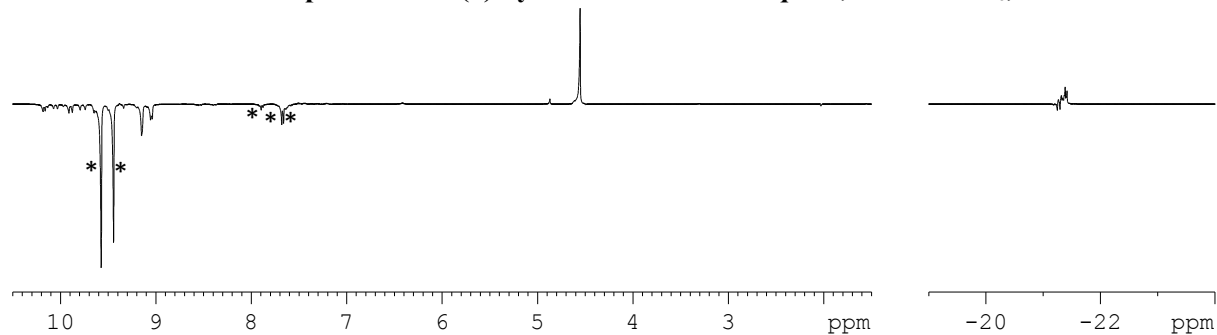

Supplement: SC-006-C5SC00756A-s001.pdf [file SC-006-C5SC00756A-s001.pdf]
